# Supplementary material for: Behavioral and neurophysiological effects of buspirone in healthy and depression-like state juvenile salmon
Source: Front Behav Neurosci. 2024 Feb 12;18:1285413. doi: 10.3389/fnbeh.2024.1285413 (PMC10894974; doi:10.3389/fnbeh.2024.1285413)
Supplement: Supplementary file 1 [file Data_Sheet_1.xlsx]

## Sheet: Dose response Experiment
Part 1												Part 2
Date	Aquaria	Treatment	Time	Fish ID	Cohesion	Top	SqrtTop	Bottom	Locomotion	SqrtLocomotion		Day	Time	Fish ID	Cohesion	LogCohesion	Top	Crossings	Locomotion
19/09/2019	1	Control	Before	1	48.1219	0	0	586	1.7	1.30384		Day 1	Before	1	52.8733	1.72324	0	0	0.93
19/09/2019	1	Control	Before	2	45.6006	0	0	314	1.2	1.09545		Day 1	Before	2	32.6334	1.51366	0	0	1.01
19/09/2019	1	Control	Before	3	48.6307	0	0	298	0	0		Day 1	Before	3	32.6334	1.51366	0	0	0
19/09/2019	1	Control	Before	4	52.1066	0	0	341	0	0		Day 1	Before	4	45.9087	1.6619	0	0	0
19/09/2019	2	3 mg	Before	1	33.2284	0	0	276	2.04	1.42829		Day 1	After	1	19.7534	1.29564	4	2	6.22
19/09/2019	2	3 mg	Before	2	22.5876	0	0	351	0.29	0.538516		Day 1	After	2	14.4311	1.1593	7	2	3.68
19/09/2019	2	3 mg	Before	3	23.6768	0	0	333	0	0		Day 1	After	3	21.5782	1.33401	0	0	1.86
19/09/2019	2	3 mg	Before	4	29.0305	4	2	265	0.41	0.640312		Day 1	After	4	17.959	1.25428	2	1	0.86
19/09/2019	3	5 mg	Before	1	41.3606	0	0	320	0.47	0.685565		Day 1	End	1	22.4601	1.35141	544	3	41.02
19/09/2019	3	5 mg	Before	2	20.2061	0	0	168	0.82	0.905539		Day 1	End	2	18.4608	1.26625	530	4	39.77
19/09/2019	3	5 mg	Before	3	22.1616	0	0	211	0	0		Day 1	End	3	17.7613	1.24947	498	4	36.57
19/09/2019	3	5 mg	Before	4	23.1364	0	0	259	0	0		Day 1	End	4	33.7739	1.52858	482	2	32.73
19/09/2019	1	Control	After	1	37.8418	49	7	473	6.83	2.61343		Day 2	Before	1	35.8347	1.5543	208	3	8.42
19/09/2019	1	Control	After	2	35.1253	41	6.40312	444	2.44	1.56205		Day 2	Before	2	22.3018	1.34834	271	2	4.64
19/09/2019	1	Control	After	3	35.6854	0	0	589	1.48	1.21655		Day 2	Before	3	22.4048	1.35034	133	3	2.87
19/09/2019	1	Control	After	4	48.5075	146	12.083	596	1.33	1.15326		Day 2	Before	4	28.4697	1.45438	187	3	1.65
19/09/2019	2	3 mg	After	1	27.1247	27	5.19615	597	17.6	4.19524		Day 2	After	1	23.3962	1.36914	403	2	11.89
19/09/2019	2	3 mg	After	2	17.149	22	4.69042	596	13.98	3.73898		Day 2	After	2	21.8546	1.33954	321	3	11.09
19/09/2019	2	3 mg	After	3	19.6814	5	2.23607	596	9.81	3.13209		Day 2	After	3	19.273	1.28495	387	2	4.93
19/09/2019	2	3 mg	After	4	19.3773	2	1.41421	597	8.26	2.87402		Day 2	After	4	29.9397	1.47625	340	2	3.74
19/09/2019	3	5 mg	After	1	19.4556	279	16.7033	600	13.56	3.68239		Day 2	End	1	23.5129	1.37131	480	2	14.65
19/09/2019	3	5 mg	After	2	14.0275	206	14.3527	600	11.83	3.43948		Day 2	End	2	18.1106	1.25793	435	2	13
19/09/2019	3	5 mg	After	3	14.0513	144	12	593	7.99	2.82666		Day 2	End	3	16.1535	1.20827	399	3	8.37
19/09/2019	3	5 mg	After	4	23.9407	128	11.3137	596	5.77	2.40208		Day 2	End	4	24.9786	1.39757	374	2	5.51
19/09/2019	1	Control	End	1	44.2296	99	9.94987	600	2.63	1.62173		Day 3	Before	1	42.8175	1.63162	600	0	1.56
19/09/2019	1	Control	End	2	26.9099	101	10.0499	600	0.62	0.787401		Day 3	Before	2	28.6991	1.45787	161	2	0.22
19/09/2019	1	Control	End	3	28.4051	67	8.18535	600	0	0		Day 3	Before	3	32.112	1.50667	0	0	0
19/09/2019	1	Control	End	4	32.9967	45	6.7082	600	0.38	0.616441		Day 3	Before	4	36.7316	1.56504	0	0	0
19/09/2019	2	3 mg	End	1	25.672	371	19.2614	598	20.51	4.5288		Day 3	After	1	18.7196	1.2723	538	1	16.33
19/09/2019	2	3 mg	End	2	24.5758	297	17.2337	600	17.26	4.15452		Day 3	After	2	16.977	1.22986	503	2	14.3
19/09/2019	2	3 mg	End	3	29.193	263	16.2173	600	10.64	3.2619		Day 3	After	3	16.4238	1.21547	449	2	11.73
19/09/2019	2	3 mg	End	4	27.8881	205	14.3178	596	9.05	3.00832		Day 3	After	4	26.4964	1.42319	370	2	9.68
19/09/2019	3	5 mg	End	1	19.143	402	20.0499	564	12.09	3.47707		Day 3	End	1	18.9871	1.27846	566	2	27.86
19/09/2019	3	5 mg	End	2	19.2607	234	15.2971	586	7.03	2.65141		Day 3	End	2	15.9633	1.20312	541	3	27.64
19/09/2019	3	5 mg	End	3	16.4185	371	19.2614	571	1.91	1.38203		Day 3	End	3	17.7817	1.24997	474	2	25.03
19/09/2019	3	5 mg	End	4	16.7585	209	14.4568	577	0.65	0.806226		Day 3	End	4	19.9453	1.29984	423	4	21.43
Treatment	Time	Cohesion	SEM Coh	Top	SEM Top	Locomotion	SEM Loco					Date	Time	Cohesion	SEM Coh	Top	SEM Top	Loco	SEM Loco
Control	Before	48.615	1.3392	0	0	0.725	0.430842					21/06/2019	Before	41.0122	5.04209	0	0	0.485	0.280491
3 mg/L	Before	27.1308	2.47251	1	1	0.685	0.459792					24/06/2019	Before	27.2527	3.20345	199.75	28.523	4.395	1.47539
5 mg/L	Before	26.7162	4.91933	0	0	0.3225	0.199431					27/06/2019	Before	35.0901	3.05669	190.25	141.757	0.445	0.375267
Control	After	39.29	3.1278	59	30.9219	3.02	1.29358					21/06/2019	After	18.4304	1.52413	3.25	1.49304	3.155	1.17664
3 mg/L	After	20.8331	2.17185	14	6.17792	12.4125	2.10918					24/06/2019	After	23.6159	2.27307	362.75	19.2976	7.9125	2.08611
5 mg/L	After	17.8688	2.39297	189.25	34.3205	9.7875	1.77423					27/06/2019	After	19.6542	2.33261	465	36.5764	13.01	1.45527
Control	End	33.1353	3.91824	78	13.4784	0.9075	0.58818					21/06/2019	End	23.114	3.70094	513.5	14.2449	37.5225	1.85201
3 mg/L	End	26.8322	1.04585	284	34.6651	14.365	2.71212					24/06/2019	End	20.6889	2.11333	422	23.0326	10.3825	2.0987
5 mg/L	End	17.8952	0.757995	304	48.3201	5.42	2.61652					27/06/2019	End	18.1694	0.858266	501	32.4525	25.49	1.49818

## Sheet: Main Experiment Behavior
Main Experiment
Day	Tank	Treatment	Cohesion	Aggression	Locomotion
Day 1	1	Buspirone	52.1255	23	0.999655
Day 1	2	Control	53.8021	10	1.05549
Day 1	3	Buspirone	60.1553	12	0.838438
Day 1	4	Control	56.3455	10	0.62
Day 1	5	Buspirone	45.3499	22	0.323958
Day 1	6	Control	60.0857	13	0.607255
Day 2	1	Buspirone	33.1534	7	4.4703
Day 2	2	Control	51.6303	16	3.52548
Day 2	3	Buspirone	57.4751	6	1.89308
Day 2	4	Control	34.3273	9	1.54783
Day 2	5	Buspirone	45.9348	6	1.6502
Day 2	6	Control	49.4723	13	1.15907
Day 3	1	Buspirone	34.6865	9	0.490741
Day 3	2	Control	50.6754	12	0.457021
Day 3	3	Buspirone	53.3217	6	0.44439
Day 3	4	Control	40.4443	6	0.288947
Day 3	5	Buspirone	42.0831	5	0.307544
Day 3	6	Control	48.1838	10	0.302963
Day 4	1	Buspirone	40.4356	5	1.05333
Day 4	2	Control	56.5747	8	0.914151
Day 4	3	Buspirone	48.214	11	0.992424
Day 4	4	Control	37.4234	6	0.426316
Day 4	5	Buspirone	49.3157	8	0.382292
Day 4	6	Control	52.7784	6	0.520625
Day 5	1	Buspirone	43.7966	8	0.659706
Day 5	2	Control	55.2192	7	0.75
Day 5	3	Buspirone	57.2647	9	0.325882
Day 5	4	Control	37.8593	19	0.728966
Day 5	5	Buspirone	54.1945	5	0.561136
Day 5	6	Control	54.3891	11	0.54
Day 6	1	Buspirone	46.7302	5	0.449512
Day 6	2	Control	49.2737	7	0.739375
Day 6	3	Buspirone	56.0439	6	0.56225
Day 6	4	Control	46.5162	8	0.437647
Day 6	5	Buspirone	43.1102	5	0.193684
Day 6	6	Control	51.9476	4	0.115185
Day 7	1	Buspirone	58.8918	4	0.955833
Day 7	2	Control	57.6375	7	0.81
Day 7	3	Buspirone	51.7641	3	0.623111
Day 7	4	Control	39.6327	5	0.629815
Day 7	5	Buspirone	39.715	5	1.055
Day 7	6	Control	46.1154	2	0.817593

## Sheet: Monoamines, Cortisol, and GE
All Data - Outliers Removed
Fish	Aquaria	Treatment	Conditions	Sex	Weight	Length	Cortisol	SqrtCortisol	HTDl	SqrtHTDl	HIDl	HIHTDl	HTDm	HIDm	HIHTDm	HT1ADM	HTVv	HIVv	HIHTVv	HTPOA	HIPOA	HIHTPOA	HTRN	HIRN	HIHTRN	HT1ARN	SqrtHT1ARN
7	5	Buspirone	Basal	F	16	11.4		0	0.112273	0.335072	0.168825	1.5037	0.174013	0.129436	0.743828	0.459468			0.878861				0.647084	0.199737	0.308672	0.328907	0.573504
8	5	Buspirone	Basal	M	19	11.2		0		0
9	5	Buspirone	Basal	M	22	12.7		0		0													0.498206	0.136815	0.274616	0.642073	0.801295
10	5	Buspirone	Basal	F	16	10.6		0	0.488393	0.698851	0.20403	0.417759	1.1575	0.412159	0.356078		0.142895						0.487948	0.139461	0.285811	0.00105655	0.0325047
11	5	Buspirone	Basal	M	11	10	0.6535	0.808393	1.07472	1.03668	0.415083	0.386226	1.52447	0.459995	0.301741	0.571906	0.0967164	0.0278461	0.287914	0.0445251	0.00657455	0.147659	0.538012	0.162134	0.301358	0.0718323	0.268016
12	5	Buspirone	Basal		9	8.9		0	0.0774918	0.278373	0.252557		0.000640697	0.000607525	0.948226	0.80057	0.0366978	0.0228852	0.623612	0.044649	0.00962802	0.215638	0.334582	0.103496	0.309328	0.131106	0.362086
19	3	Buspirone	Basal	F	17	11.3		0		0												0.247176
20	3	Buspirone	Basal	M	18	11.5	4.611	2.14732		0
21	3	Buspirone	Basal	M	16	11.3		0		0
22	3	Buspirone	Basal	F	15	10.7	2.471	1.57194	0.14543	0.381352	0.420577				0.674728		0.198023	0.0695806	0.351376	0.0240972	0.020846		0.53939	0.190422	0.353032
23	3	Buspirone	Basal		11	10.1	0.6004	0.774855	1.15506	1.07474	0.395665	0.342549	0.51321	0.213536	0.41608	1.10061	0.0642877	0.0456525	0.710129	0.0647294	0.0143611	0.221863	0.339849	0.0806227	0.237231	0.120389	0.346971
24	3	Buspirone	Basal	M	11	9.6		0		0
31	1	Buspirone	Basal	M	22	11.7		0	0.537703	0.733282	0.69131	1.28567			0.437119		0.040808	0.0218297	0.534937		0.0411272	0.1375	0.374108	0.16789	0.448774
32	1	Buspirone	Basal	M	22	12.5	2.823	1.68018	0.134166	0.366287	0.141925	1.05783	0.000335339	0.00032102	0.957302	0.0101638	0.0261961	0.0135076	0.515635				0.333055	0.0728106	0.218614	0.000225742	0.0150247
33	1	Buspirone	Basal	F	23	12.5		0		0
34	1	Buspirone	Basal	M	16	11.6	3.123	1.7672		0			0.000262748	0.000233809	0.889862		0.0273604						0.495608	0.157483	0.317757	0.000378851	0.0194641
35	1	Buspirone	Basal	M	18	11.5	6.732	2.59461	1.94488	1.39459	0.54128	0.27831	0.77789	0.333421	0.428623	1.21043	0.0736933	0.0390552	0.52997	0.0392891	0.010106	0.257222	0.544008	0.113932	0.209431	0.373209	0.610908
36	6	Buspirone	Basal	F	13	10.5		0	0.26084	0.510725	0.0858766	0.32923	0.557082	0.403999	0.725205	0.198586			0.439444	0.0388401	0.0221258		0.466764	0.141086	0.302265	0.14037	0.37466
43	5	Buspirone	Stress	M	13	10.7	28.39	5.32823	0.0162225	0.127367	0.0367634		0.00669747	0.0336109		0.456	0.230022	0.13587	0.59068	0.0298648	0.011605	0.388586
44	5	Buspirone	Stress	F	20	12.2	131.3	11.4586		0
45	5	Buspirone	Stress	M	22	12.4	161.6	12.7122		0			0.0991295	0.195048		2.03573				0.0584808	0.103074	1.76254	0.498509	0.386287	0.774884	1.77218e-05	0.00420973
46	5	Buspirone	Stress	F	13	10.6	123.3	11.1041		0		0.578433	0.935085	0.766976	0.82022	0.207172	0.0370943	0.0263748	0.711022	0.146966	0.0578428	0.393579
47	5	Buspirone	Stress	M	20	12.6	132.3	11.5022		0			0.201842	0.219388	1.08693	0.853437	0.0504332	0.0328281	0.650922	0.130082		1.36732	0.511435	0.278258	0.544073	3.93059e-06	0.00198257
48	5	Buspirone	Stress	F	19	11.8	100.7	10.0349	0.128475	0.358434	0.364204		0.691039	0.369746	0.535058	0.00618835	0.195401	0.211351	1.08163	0.155767	0.0526123	0.337763	0.425129	0.271526	0.638692
55	3	Buspirone	Stress	M	26	13.4		0	0.018596	0.136367	0.0129683	0.697373	0.683825	0.595297	0.870539	2.56462	0.0331845	0.0124502	0.375183	0.0968612	0.0372764	0.384843	0.369299	0.195427	0.529184	0.00022171	0.0148899
56	3	Buspirone	Stress	M	17	11.4	99.79	9.98949		0			0.835559	0.482328	0.577252								0.5728	0.217803	0.380242	9.35836e-06	0.00305914
57	3	Buspirone	Stress					0		0					0.811088	1.95731	0.146822	0.204135	1.39036	0.0329993	0.0294008	0.890952	0.265615	0.174196	0.655822
58	3	Buspirone	Stress	M	20	12.3	122.8	11.0815	0.163307	0.404112	0.170585	1.04457	0.0981954	0.154377		1.85182	0.0366692	0.0423336	1.15447	0.311138	0.0840619	0.270176	0.585714	0.249483	0.425947
59	3	Buspirone	Stress	M	18	11.7	95.79	9.78724		0			0.730668	0.622675	0.852199		0.355207	0.200382	0.564129				0.255312	0.145845	0.571241
60	3	Buspirone	Stress	F	11	10.2	104.3	10.2127		0	0.41225	0.542258												0.434675	0.450801	4.81698e-06	0.00219476
67	1	Buspirone	Stress	F	22	11.4		0	0.200048	0.447267	0.194408	0.971809	0.375379	0.285142	0.759609		0.0477138	0.038066	0.797798	0.0323086	0.0305914	0.946849	0.542851	0.217385	0.40045	0.00760581	0.0872113
68	1	Buspirone	Stress	F	20	12.1	164.4	12.8219		0		1.08025	0.689246	0.413984	0.600634	0.00819236	0.525931	0.146804	0.279131	0.192051	0.0293509	0.152829	0.422886	0.338907	0.801415
69	1	Buspirone	Stress	F	20	12.1		0		0	0.188966	0.251352	0.494886	0.242093	0.489188	0.577452	0.062926	0.0324535	0.515741	0.0361232	0.0231635	0.641235	0.333558	0.21139	0.633743
70	1	Buspirone	Stress	M	24	13	222.5	14.9164		0
71	1	Buspirone	Stress	F	25	13.2	140.3	11.8448		0
72	1	Buspirone	Stress	F	19	12	179.1	13.3828		0
1	6	Control	Basal	F	22	12.6	4.675	2.16217	0.0526486	0.229453	0.0900082	1.7096	2.84478	1.84082	0.647087	1.27825	0.0180774	0.0154107	0.852488		0.0227719		0.273201	0.138171	0.505749
2	6	Control	Basal	F	24	12.6	7.046	2.65443		0
3	6	Control	Basal	F	13	10.2		0		0			1.76458	0.817261	0.463147	1.72408	0.0896082	0.0270689	0.302081	0.0549018	0.016132	0.293834	0.290087	0.0880307	0.303463	2.04005e-08	0.00014283
4	6	Control	Basal	F	8	8.5		0	0.190933	0.436959	0.320976	1.68109	0.960613	0.601491	0.626153	0.949779	0.0223179	0.0394047	1.76561	0.0378063	0.0211019	0.55816	0.158846	0.0692542	0.435982	0.00576589	0.0759334
5	6	Control	Basal	M	8	8.9		0	0.139294	0.373221	0.124586	0.894414	4.02553	1.53487	0.381283	0.0945823	0.389285		0.641561	0.0410756	0.0136339	0.331921	0.350477	0.113632	0.32422
6	6	Control	Basal	F	21	11.8		0	0.087429	0.295684	0.274137		0.763859	0.57879	0.757718		0.0530502	0.0663684	1.25105	0.0420169	0.00975796	0.232239	0.640841	0.204153	0.31857	4.13359e-06	0.00203312
13	4	Control	Basal	F	22	12.5		0		0			0.274966	0.277573	1.00948	0.411794	0.0238041	0.0396454	1.66548		0.0350494	0.481074	0.257538	0.100785	0.391342	0.00259006	0.0508926
14	4	Control	Basal	F	16	11.1		0	0.305863	0.553049	0.465675	1.52249	0.812515	1.15317	1.41926	0.463208	0.0318422	0.0184163	0.578362		0.0398494	0.517584	0.536281	0.17803	0.331972	0.160382	0.400478
15	4	Control	Basal	M	21	12.2	6.557	2.56066		0	0.845005	0.558632	6.4677	3.79133	0.586194							0.230712	0.426508	0.178873	0.41939	0.145455	0.381385
16	4	Control	Basal	F	20	12.2	1.302	1.14105		0
17	4	Control	Basal	F	16	11		0	0.076872	0.277258	0.0506876	0.659376	0.000264055	0.000142368	0.539161	0.0766274	0.224454		0.670937	0.0462881	0.021356	0.461371	0.463569	0.232317	0.501148	3.74612e-05	0.00612055
18	4	Control	Basal	F	13	10.5		0		0
25	2	Control	Basal	M	21	12.1	4.125	2.03101	0.50213	0.708611	0.195331	0.389004	6.05392	2.86418	0.473113	0.743216	0.164131	0.031372	0.19114	0.0418222	0.0233113	0.557392	0.415704	0.128554	0.309245	0.00108794	0.032984
26	2	Control	Basal	F	23	12.5	5.832	2.41495		0
27	2	Control	Basal	F	26	13.3	5.521	2.34968		0
28	2	Control	Basal	M	26	13.1	1.481	1.21696		0
29	2	Control	Basal	F	17	11.6		0		0	0.536596	0.438017	0.270187	0.308721	1.14262	1.235	0.425222		0.520273	0.0422376	0.0240013	0.568244	0.24015	0.0947239	0.394437
30	2	Control	Basal	F	17	11.3		0	0.0336676	0.183487	0.0267366	0.794133	0.821638	0.333979	0.40648	1.00787	0.378736		0.50118	0.0395939	0.0188009	0.474843	0.203492	0.106351	0.522631
37	6	Control	Stress	M	14	10.4	118.2	10.872		0
38	6	Control	Stress	M	20	12.2	83.39	9.13181	0.154711	0.393333	0.0882498	0.570419	1.94782	2.36017	1.2117		0.0535068	0.0618805	1.1565				0.416839	0.253429	0.607979
39	6	Control	Stress	M	20	11.9		0	0.077725	0.278792	0.0660787	0.850159	0.000138802	9.95334e-05	0.71709	0.0509087	0.0278486	0.0235484	0.845586	0.0451897	0.0156986	0.347392	0.542083	0.371225	0.684813	7.53239e-07	0.000867893
40	6	Control	Stress	F	13	10.6		0	0.324635	0.569768	0.341796	1.05286								0.0531288	0.0402845	0.758242
41	6	Control	Stress	M	15	11	86.12	9.28009		0
42	6	Control	Stress	F	23	12.1		0	0.33496	0.578757	0.352116	1.05122	1.04354	0.978355	0.937531	3.40538	0.107939	0.103474	0.958632	0.0809993	0.0333777	0.412074			0.689704	0.000663694	0.0257623
49	4	Control	Stress	F	21	12.3	91.94	9.58853	0.907583	0.952672	0.373963	0.412042	0.529453	0.37904	0.715909	0.663674	0.0407264	0.0257388	0.631993	0.0412893	0.0301695	0.730685	0.365256	0.156038	0.427201
50	4	Control	Stress	F	21	13.6	112.8	10.6207		0
51	4	Control	Stress	F	21	12.4	108.4	10.4115		0			2.29058	2.52835	1.1038	0.367004		0.344234	0.314766	0.0594335	0.0499365	0.840208	0.492284	0.383075	0.778159	0.035575	0.188613
52	4	Control	Stress	M	22	12.7	101.1	10.0548	1.56278	1.25011	0.768007	0.491438	0.169812	0.120725	0.710931	0.227744	0.102642	0.0741582	0.722491	0.11274	0.0475369	0.421652	0.293061	0.31781		0.000954424	0.0308938
53	4	Control	Stress	F	16	11	103.2	10.1587	0.6253	0.790759	0.813645	1.30121	0.889148	1.05668	1.18842	1.88356				0.0584231	0.0415321	0.710885	0.246387	0.147537	0.598801	0.0100275	0.100137
54	4	Control	Stress	M	24	12.9	109.8	10.4785	0.857302	0.925906	0.392177	0.457455	1.63847				0.169951	0.253951	1.49426	0.109254	0.0219824	0.201203	0.616783	0.371493	0.602308	5.16194e-05	0.00718467
61	2	Control	Stress	M	20	12	88.42	9.40319	0.0644175	0.253806	0.0921987	1.43127	0.634445	0.241422	0.380525		0.0768078	0.0532583	0.693397			0.382013	0.410546	0.171738	0.418317
62	2	Control	Stress	M	21	12.2	85.75	9.26013		0					0.50553	2.67274		0.213205	0.152928				0.265462	0.128989	0.485903	0.0205086	0.143208
63	2	Control	Stress	F	15	10.9	101.5	10.0747		0			0.402062	0.158327	0.393786		0.100074	0.154857	1.54743	0.0424408	0.0290738	0.685045	0.449742	0.194449	0.432358
64	2	Control	Stress	F	20	11.8	98.25	9.91211		0
65	2	Control	Stress	M	10	9.6		0		0			2.44456	1.31669	0.538622		0.187561	0.0884025	0.471326	0.0189673	0.0134313	0.708132	0.320218	0.388576
66	2	Control	Stress		6	8.7	81.42	9.0233		0

## Sheet: Posthocs
Dose response experiment Part 1			Dose response experiment Part 2			Main Behavioral Experiment			Monoamines, Cortisol, and Gene Expression
Cohesion	P value		Cohesion	P value		Cohesion	P value		Cortisol	P value
After 3 mg - Before 3 mg	0.0154		After Day 1 - Before Day 1	<.0001		Buspirone Day 1 - Control Day 1	1		Buspirone Basal - Control Basal	0.9893
After 3 mg - End 3 mg	1		After Day 1 - End Day 1	0.473		Buspirone Day 1 - Buspirone Day 2	0.2131		Buspirone Basal - Buspirone Stress	<.0001
After 3 mg - After 5 mg	0.5937		After Day 1 - After Day 2	0.2426		Buspirone Day 1 - Control Day 2	0.8967		Buspirone Basal - Control Stress	0.0103
After 3 mg - Before 5 mg	0.9054		After Day 1 - Before Day 2	0.0121		Buspirone Day 1 - Buspirone Day 3	0.1643		Control Basal - Buspirone Stress	0.0036
After 3 mg - End 5 mg	0.8936		After Day 1 - End Day 2	0.9568		Buspirone Day 1 - Control Day 3	0.872		Control Basal - Control Stress	<.0001
After 3 mg - After Control	<.0001		After Day 1 - After Day 3	0.9995		Buspirone Day 1 - Buspirone Day 4	0.5836		Buspirone Stress - Control Stress	0.2128
After 3 mg - Before Control	<.0001		After Day 1 - Before Day 3	<.0001		Buspirone Day 1 - Control Day 4	0.9781
After 3 mg - End Control	0.0006		After Day 1 - End Day 3	1		Buspirone Day 1 - Buspirone Day 5	0.9836		HTDl
Before 3 mg - End 3 mg	0.0146		Before Day 1 - End Day 1	0.0001		Buspirone Day 1 - Control Day 5	0.9999		Basal Buspirone - Stress Buspirone	0.9999
Before 3 mg - After 5 mg	0.0084		Before Day 1 - After Day 2	0.0002		Buspirone Day 1 - Buspirone Day 6	0.8566		Basal Buspirone - Basal Control	0.046
Before 3 mg - Before 5 mg	0.5937		Before Day 1 - Before Day 2	0.0067		Buspirone Day 1 - Control Day 6	0.9967		Basal Buspirone - Stress Control	0.7663
Before 3 mg - End 5 mg	0.0081		Before Day 1 - End Day 2	<.0001		Buspirone Day 1 - Buspirone Day 7	0.8598		Stress Buspirone - Basal Control	0.0232
Before 3 mg - After Control	0.3095		Before Day 1 - After Day 3	<.0001		Buspirone Day 1 - Control Day 7	0.9968		Stress Buspirone - Stress Control	0.6843
Before 3 mg - Before Control	<.0001		Before Day 1 - Before Day 3	0.8336		Control Day 1 - Buspirone Day 2	0.7971		Basal Control - Stress Control	0.2716
Before 3 mg - End Control	0.3166		Before Day 1 - End Day 3	<.0001		Control Day 1 - Control Day 2	0.2131
End 3 mg - After 5 mg	0.9041		End Day 1 - After Day 2	0.9999		Control Day 1 - Buspirone Day 3	0.7664		5-HIAA Dl
End 3 mg - Before 5 mg	0.9003		End Day 1 - Before Day 2	0.6262		Control Day 1 - Control Day 3	0.1643		Basal Buspirone - Stress Buspirone	0.9333
End 3 mg - End 5 mg	0.5937		End Day 1 - End Day 2	0.9849		Control Day 1 - Buspirone Day 4	0.9243		Basal Buspirone - Basal Control	0.9319
End 3 mg - After Control	0.0005		End Day 1 - After Day 3	0.823		Control Day 1 - Control Day 4	0.5836		Basal Buspirone - Stress Control	0.999
End 3 mg - Before Control	<.0001		End Day 1 - Before Day 3	0.0028		Control Day 1 - Buspirone Day 5	0.9963		Stress Buspirone - Basal Control	0.8507
End 3 mg - End Control	<.0001		End Day 1 - End Day 3	0.4307		Control Day 1 - Control Day 5	0.9836		Stress Buspirone - Stress Control	0.9319
After 5 mg - Before 5 mg	0.0154		After Day 2 - Before Day 2	0.8709		Control Day 1 - Buspirone Day 6	0.9759		Basal Control - Stress Control	0.9333
After 5 mg - End 5 mg	1		After Day 2 - End Day 2	0.8775		Control Day 1 - Control Day 6	0.8566
After 5 mg - After Control	<.0001		After Day 2 - After Day 3	0.5602		Control Day 1 - Buspirone Day 7	0.9764		5-HAA/5-HT Dl
After 5 mg - Before Control	<.0001		After Day 2 - Before Day 3	0.0082		Control Day 1 - Control Day 7	0.8598		Basal Buspirone - Stress Buspirone	0.9908
After 5 mg - End Control	<.0001		After Day 2 - End Day 3	0.2146		Buspirone Day 2 - Control Day 2	1		Basal Buspirone - Basal Control	0.6223
Before 5 mg - End 5 mg	0.0146		Before Day 2 - End Day 2	0.148		Buspirone Day 2 - Buspirone Day 3	1		Basal Buspirone - Stress Control	0.9094
Before 5 mg - After Control	0.0177		Before Day 2 - After Day 3	0.0461		Buspirone Day 2 - Control Day 3	1		Stress Buspirone - Basal Control	0.7203
Before 5 mg - Before Control	<.0001		Before Day 2 - Before Day 3	0.1819		Buspirone Day 2 - Buspirone Day 4	1		Stress Buspirone - Stress Control	0.6223
Before 5 mg - End Control	0.0183		Before Day 2 - End Day 3	0.0102		Buspirone Day 2 - Control Day 4	1		Basal Control - Stress Control	0.9908
End 5 mg - After Control	<.0001		End Day 2 - After Day 3	0.9996		Buspirone Day 2 - Buspirone Day 5	0.9265
End 5 mg - Before Control	<.0001		End Day 2 - Before Day 3	0.0003		Buspirone Day 2 - Control Day 5	0.987		5-HT Dm
End 5 mg - End Control	<.0001		End Day 2 - End Day 3	0.9401		Buspirone Day 2 - Buspirone Day 6	0.9956		Basal Buspirone - Stress Buspirone	0.5243
After Control - Before Control	0.0154		After Day 3 - Before Day 3	0.0001		Buspirone Day 2 - Control Day 6	0.9987		Basal Buspirone - Basal Control	0.0526
After Control - End Control	1		After Day 3 - End Day 3	0.9988		Buspirone Day 2 - Buspirone Day 7	0.9953		Basal Buspirone - Stress Control	0.8159
Before Control - End Control	0.0146		Before Day 3 - End Day 3	<.0001		Buspirone Day 2 - Control Day 7	0.9987		Stress Buspirone - Basal Control	0.0239
						Control Day 2 - Buspirone Day 3	1		Stress Buspirone - Stress Control	0.0526
Time at Top			Time at top			Control Day 2 - Control Day 3	1		Basal Control - Stress Control	0.5243
After 3 mg - Before 3 mg	0.6811		After Day 1 - Before Day 1	1		Control Day 2 - Buspirone Day 4	1
After 3 mg - End 3 mg	<.0001		After Day 1 - End Day 1	<.0001		Control Day 2 - Control Day 4	1		5-HIAA Dm
After 3 mg - After 5 mg	<.0001		After Day 1 - After Day 2	0.0003		Control Day 2 - Buspirone Day 5	0.9989		Basal Buspirone - Stress Buspirone	0.9934
After 3 mg - Before 5 mg	0.4878		After Day 1 - Before Day 2	0.1086		Control Day 2 - Control Day 5	0.9265		Basal Buspirone - Basal Control	0.0162
After 3 mg - End 5 mg	<.0001		After Day 1 - End Day 2	<.0001		Control Day 2 - Buspirone Day 6	1		Basal Buspirone - Stress Control	0.2303
After 3 mg - After Control	0.6416		After Day 1 - After Day 3	<.0001		Control Day 2 - Control Day 6	0.9956		Stress Buspirone - Basal Control	0.0649
After 3 mg - Before Control	0.4878		After Day 1 - Before Day 3	0.1441		Control Day 2 - Buspirone Day 7	1		Stress Buspirone - Stress Control	0.0162
After 3 mg - End Control	0.0575		After Day 1 - End Day 3	<.0001		Control Day 2 - Control Day 7	0.9953		Basal Control - Stress Control	0.9934
Before 3 mg - End 3 mg	<.0001		Before Day 1 - End Day 1	<.0001		Buspirone Day 3 - Control Day 3	1
Before 3 mg - After 5 mg	<.0001		Before Day 1 - After Day 2	0.0003		Buspirone Day 3 - Buspirone Day 4	0.9999		5-HAA/5-HT Dm
Before 3 mg - Before 5 mg	1		Before Day 1 - Before Day 2	0.0983		Buspirone Day 3 - Control Day 4	0.9999		Basal Buspirone - Stress Buspirone	0.6978
Before 3 mg - End 5 mg	<.0001		Before Day 1 - End Day 2	<.0001		Buspirone Day 3 - Buspirone Day 5	0.8775		Basal Buspirone - Basal Control	0.9497
Before 3 mg - After Control	0.0277		Before Day 1 - After Day 3	<.0001		Buspirone Day 3 - Control Day 5	0.9792		Basal Buspirone - Stress Control	0.6729
Before 3 mg - Before Control	1		Before Day 1 - Before Day 3	0.131		Buspirone Day 3 - Buspirone Day 6	0.988		Stress Buspirone - Basal Control	0.988
Before 3 mg - End Control	0.0008		Before Day 1 - End Day 3	<.0001		Buspirone Day 3 - Control Day 6	0.9972		Stress Buspirone - Stress Control	0.9497
End 3 mg - After 5 mg	0.5723		End Day 1 - After Day 2	0.3689		Buspirone Day 3 - Buspirone Day 7	0.9874		Basal Control - Stress Control	0.6978
End 3 mg - Before 5 mg	<.0001		End Day 1 - Before Day 2	0.0018		Buspirone Day 3 - Control Day 7	0.997
End 3 mg - End 5 mg	1		End Day 1 - End Day 2	0.8837		Control Day 3 - Buspirone Day 4	1		5-HT Vv
End 3 mg - After Control	<.0001		End Day 1 - After Day 3	0.9974		Control Day 3 - Control Day 4	0.9999		Basal Buspirone - Stress Buspirone	0.9996
End 3 mg - Before Control	<.0001		End Day 1 - Before Day 3	0.0012		Control Day 3 - Buspirone Day 5	0.9974		Basal Buspirone - Basal Control	0.9866
End 3 mg - End Control	0.0011		End Day 1 - End Day 3	1		Control Day 3 - Control Day 5	0.8775		Basal Buspirone - Stress Control	0.9903
After 5 mg - Before 5 mg	<.0001		After Day 2 - Before Day 2	0.2762		Control Day 3 - Buspirone Day 6	0.9999		Stress Buspirone - Basal Control	0.9982
After 5 mg - End 5 mg	0.3832		After Day 2 - End Day 2	0.99		Control Day 3 - Control Day 6	0.988		Stress Buspirone - Stress Control	0.9866
After 5 mg - After Control	0.0038		After Day 2 - After Day 3	0.809		Control Day 3 - Buspirone Day 7	0.9999		Basal Control - Stress Control	0.9996
After 5 mg - Before Control	<.0001		After Day 2 - Before Day 3	0.2161		Control Day 3 - Control Day 7	0.9874
After 5 mg - End Control	0.1053		After Day 2 - End Day 3	0.4788		Buspirone Day 4 - Control Day 4	1		5-HIAA Vv
Before 5 mg - End 5 mg	<.0001		Before Day 2 - End Day 2	0.0476		Buspirone Day 4 - Buspirone Day 5	0.9993		Basal Buspirone - Stress Buspirone	0.0199
Before 5 mg - After Control	0.0135		Before Day 2 - After Day 3	0.0106		Buspirone Day 4 - Control Day 5	0.9997		Basal Buspirone - Basal Control	0.8907
Before 5 mg - Before Control	1		Before Day 2 - Before Day 3	1		Buspirone Day 4 - Buspirone Day 6	1		Basal Buspirone - Stress Control	0.1602
Before 5 mg - End Control	0.0004		Before Day 2 - End Day 3	0.0028		Buspirone Day 4 - Control Day 6	1		Stress Buspirone - Basal Control	0.4107
End 5 mg - After Control	<.0001		End Day 2 - After Day 3	0.9989		Buspirone Day 4 - Buspirone Day 7	1		Stress Buspirone - Stress Control	0.8907
End 5 mg - Before Control	<.0001		End Day 2 - Before Day 3	0.0346		Buspirone Day 4 - Control Day 7	1		Basal Control - Stress Control	0.0199
End 5 mg - End Control	0.0005		End Day 2 - End Day 3	0.9449		Control Day 4 - Buspirone Day 5	1
After Control - Before Control	0.0135		After Day 3 - Before Day 3	0.0075		Control Day 4 - Control Day 5	0.9993		5-HAA/5-HT Vv
After Control - End Control	0.8589		After Day 3 - End Day 3	0.9997		Control Day 4 - Buspirone Day 6	1		Basal Buspirone - Stress Buspirone	0.869
Before Control - End Control	0.0004		Before Day 3 - End Day 3	0.002		Control Day 4 - Control Day 6	1		Basal Buspirone - Basal Control	0.5244
						Control Day 4 - Buspirone Day 7	1		Basal Buspirone - Stress Control	0.4625
Crossings			Crossings			Control Day 4 - Control Day 7	1		Stress Buspirone - Basal Control	0.9711
After 3 mg - Before 3 mg	0.0526		After Day 1 - Before Day 1	0.3089		Buspirone Day 5 - Control Day 5	1		Stress Buspirone - Stress Control	0.5244
After 3 mg - End 3 mg	1		After Day 1 - End Day 1	0.0162		Buspirone Day 5 - Buspirone Day 6	1		Basal Control - Stress Control	0.869
After 3 mg - After 5 mg	1		After Day 1 - After Day 2	0.5883		Buspirone Day 5 - Control Day 6	1
After 3 mg - Before 5 mg	0.025		After Day 1 - Before Day 2	0.1316		Buspirone Day 5 - Buspirone Day 7	1		5-HT POA
After 3 mg - End 5 mg	0.9808		After Day 1 - End Day 2	0.5883		Buspirone Day 5 - Control Day 7	1		Basal Buspirone - Stress Buspirone	0.1324
After 3 mg - After Control	0.7479		After Day 1 - After Day 3	0.9848		Control Day 5 - Buspirone Day 6	1		Basal Buspirone - Basal Control	0.3886
After 3 mg - Before Control	0.0526		After Day 1 - Before Day 3	0.8612		Control Day 5 - Control Day 6	1		Basal Buspirone - Stress Control	0.966
After 3 mg - End Control	0.9808		After Day 1 - End Day 3	0.1316		Control Day 5 - Buspirone Day 7	1		Stress Buspirone - Basal Control	0.0362
Before 3 mg - End 3 mg	0.0526		Before Day 1 - End Day 1	<.0001		Control Day 5 - Control Day 7	1		Stress Buspirone - Stress Control	0.3886
Before 3 mg - After 5 mg	0.0526		Before Day 1 - After Day 2	0.0051		Buspirone Day 6 - Control Day 6	1		Basal Control - Stress Control	0.1324
Before 3 mg - Before 5 mg	1		Before Day 1 - Before Day 2	0.0005		Buspirone Day 6 - Buspirone Day 7	1
Before 3 mg - End 5 mg	0.0051		Before Day 1 - End Day 2	0.0051		Buspirone Day 6 - Control Day 7	1		5-HIAA POA
Before 3 mg - After Control	0.7479		Before Day 1 - After Day 3	0.0484		Control Day 6 - Buspirone Day 7	1		Basal Buspirone - Stress Buspirone	0.0228
Before 3 mg - Before Control	1		Before Day 1 - Before Day 3	0.9848		Control Day 6 - Control Day 7	1		Basal Buspirone - Basal Control	0.8098
Before 3 mg - End Control	0.3468		Before Day 1 - End Day 3	0.0005		Buspirone Day 7 - Control Day 7	1		Basal Buspirone - Stress Control	0.4804
End 3 mg - After 5 mg	1		End Day 1 - After Day 2	0.5883					Stress Buspirone - Basal Control	0.0289
End 3 mg - Before 5 mg	0.025		End Day 1 - Before Day 2	0.9848		Aggression			Stress Buspirone - Stress Control	0.8098
End 3 mg - End 5 mg	0.9808		End Day 1 - End Day 2	0.5883		Buspirone Day 1 - Control Day 1	0.9988		Basal Control - Stress Control	0.0228
End 3 mg - After Control	0.7479		End Day 1 - After Day 3	0.1316		Buspirone Day 1 - Buspirone Day 2	0.3886
End 3 mg - Before Control	0.0526		End Day 1 - Before Day 3	0.0005		Buspirone Day 1 - Control Day 2	0.7706		5-HAA/5-HT POA
End 3 mg - End Control	0.9808		End Day 1 - End Day 3	0.9848		Buspirone Day 1 - Buspirone Day 3	0.1078		Basal Buspirone - Stress Buspirone	0.0191
After 5 mg - Before 5 mg	0.025		After Day 2 - Before Day 2	0.9848		Buspirone Day 1 - Control Day 3	0.5263		Basal Buspirone - Basal Control	0.5351
After 5 mg - End 5 mg	0.9808		After Day 2 - End Day 2	1		Buspirone Day 1 - Buspirone Day 4	0.0541		Basal Buspirone - Stress Control	0.2335
After 5 mg - After Control	0.7479		After Day 2 - After Day 3	0.9848		Buspirone Day 1 - Control Day 4	0.4333		Stress Buspirone - Basal Control	0.3251
After 5 mg - Before Control	0.0526		After Day 2 - Before Day 3	0.0484		Buspirone Day 1 - Buspirone Day 5	0.4836		Stress Buspirone - Stress Control	0.7869
After 5 mg - End Control	0.9808		After Day 2 - End Day 3	0.9848		Buspirone Day 1 - Control Day 5	0.8235		Basal Control - Stress Control	0.7229
Before 5 mg - End 5 mg	0.0023		Before Day 2 - End Day 2	0.9848		Buspirone Day 1 - Buspirone Day 6	0.0097
Before 5 mg - After Control	0.542		Before Day 2 - After Day 3	0.5883		Buspirone Day 1 - Control Day 6	0.2753		5-HT RN
Before 5 mg - Before Control	1		Before Day 2 - Before Day 3	0.0051		Buspirone Day 1 - Buspirone Day 7	0.0015		Basal Buspirone - Stress Buspirone	0.9966
Before 5 mg - End Control	0.1998		Before Day 2 - End Day 3	1		Buspirone Day 1 - Control Day 7	0.176		Basal Buspirone - Basal Control	0.1825
End 5 mg - After Control	0.1998		End Day 2 - After Day 3	0.9848		Control Day 1 - Buspirone Day 2	0.4814		Basal Buspirone - Stress Control	0.5622
End 5 mg - Before Control	0.0051		End Day 2 - Before Day 3	0.0484		Control Day 1 - Control Day 2	0.3886		Stress Buspirone - Basal Control	0.385
End 5 mg - End Control	0.542		End Day 2 - End Day 3	0.9848		Control Day 1 - Buspirone Day 3	0.3068		Stress Buspirone - Stress Control	0.1825
After Control - Before Control	0.7479		After Day 3 - Before Day 3	0.3089		Control Day 1 - Control Day 3	0.1078		Basal Control - Stress Control	0.9966
After Control - End Control	0.9987		After Day 3 - End Day 3	0.5883		Control Day 1 - Buspirone Day 4	0.2507
Before Control - End Control	0.3468		Before Day 3 - End Day 3	0.0051		Control Day 1 - Control Day 4	0.0541		5-HIAA RN
						Control Day 1 - Buspirone Day 5	0.5299		Basal Buspirone - Stress Buspirone	<.0001
Locomotion			Locomotion			Control Day 1 - Control Day 5	0.4836		Basal Buspirone - Basal Control	1
After 3 mg - Before 3 mg	<.0001		After Day 1 - Before Day 1	0.274		Control Day 1 - Buspirone Day 6	0.1609		Basal Buspirone - Stress Control	0.0016
After 3 mg - End 3 mg	0.9692		After Day 1 - End Day 1	<.0001		Control Day 1 - Control Day 6	0.0097		Stress Buspirone - Basal Control	0.0012
After 3 mg - After 5 mg	0.7292		After Day 1 - After Day 2	0.0041		Control Day 1 - Buspirone Day 7	0.1058		Stress Buspirone - Stress Control	1
After 3 mg - Before 5 mg	<.0001		After Day 1 - Before Day 2	0.9559		Control Day 1 - Control Day 7	0.0015		Basal Control - Stress Control	<.0001
After 3 mg - End 5 mg	0.0001		After Day 1 - End Day 2	<.0001		Buspirone Day 2 - Control Day 2	0.9988
After 3 mg - After Control	<.0001		After Day 1 - After Day 3	<.0001		Buspirone Day 2 - Buspirone Day 3	1		5-HAA/5-HT RN
After 3 mg - Before Control	<.0001		After Day 1 - Before Day 3	0.2576		Buspirone Day 2 - Control Day 3	1		Basal Buspirone - Stress Buspirone	<.0001
After 3 mg - End Control	<.0001		After Day 1 - End Day 3	<.0001		Buspirone Day 2 - Buspirone Day 4	0.9985		Basal Buspirone - Basal Control	0.1195
Before 3 mg - End 3 mg	<.0001		Before Day 1 - End Day 1	<.0001		Buspirone Day 2 - Control Day 4	1		Basal Buspirone - Stress Control	<.0001
Before 3 mg - After 5 mg	<.0001		Before Day 1 - After Day 2	<.0001		Buspirone Day 2 - Buspirone Day 5	1		Stress Buspirone - Basal Control	0.0019
Before 3 mg - Before 5 mg	0.9687		Before Day 1 - Before Day 2	0.0268		Buspirone Day 2 - Control Day 5	1		Stress Buspirone - Stress Control	0.9994
Before 3 mg - End 5 mg	0.0001		Before Day 1 - End Day 2	<.0001		Buspirone Day 2 - Buspirone Day 6	0.891		Basal Control - Stress Control	0.0023
Before 3 mg - After Control	0.0069		Before Day 1 - After Day 3	<.0001		Buspirone Day 2 - Control Day 6	0.9802
Before 3 mg - Before Control	1		Before Day 1 - Before Day 3	1		Buspirone Day 2 - Buspirone Day 7	0.4836		5-HT1AA RN
Before 3 mg - End Control	0.9999		Before Day 1 - End Day 3	<.0001		Buspirone Day 2 - Control Day 7	0.8235		Basal Buspirone - Stress Buspirone	0.012
End 3 mg - After 5 mg	0.1618		End Day 1 - After Day 2	<.0001		Control Day 2 - Buspirone Day 3	0.9924		Basal Buspirone - Basal Control	0.076
End 3 mg - Before 5 mg	<.0001		End Day 1 - Before Day 2	<.0001		Control Day 2 - Control Day 3	1		Basal Buspirone - Stress Control	0.0304
End 3 mg - End 5 mg	<.0001		End Day 1 - End Day 2	<.0001		Control Day 2 - Buspirone Day 4	0.9622		Stress Buspirone - Basal Control	0.7412
End 3 mg - After Control	<.0001		End Day 1 - After Day 3	<.0001		Control Day 2 - Control Day 4	0.9985		Stress Buspirone - Stress Control	0.9547
End 3 mg - Before Control	<.0001		End Day 1 - Before Day 3	<.0001		Control Day 2 - Buspirone Day 5	1		Basal Control - Stress Control	0.9563
End 3 mg - End Control	<.0001		End Day 1 - End Day 3	<.0001		Control Day 2 - Control Day 5	1
After 5 mg - Before 5 mg	<.0001		After Day 2 - Before Day 2	0.0602		Control Day 2 - Buspirone Day 6	0.7745		5-HT1AA DM
After 5 mg - End 5 mg	0.0054		After Day 2 - End Day 2	0.3661		Control Day 2 - Control Day 6	0.891		Basal Buspirone - Stress Buspirone	0.8025
After 5 mg - After Control	0.0001		After Day 2 - After Day 3	0.0019		Control Day 2 - Buspirone Day 7	0.5299		Basal Buspirone - Basal Control	0.9825
After 5 mg - Before Control	<.0001		After Day 2 - Before Day 3	<.0001		Control Day 2 - Control Day 7	0.4836		Basal Buspirone - Stress Control	0.3527
After 5 mg - End Control	<.0001		After Day 2 - End Day 3	<.0001		Buspirone Day 3 - Control Day 3	0.9988		Stress Buspirone - Basal Control	0.9806
Before 5 mg - End 5 mg	<.0001		Before Day 2 - End Day 2	0.0002		Buspirone Day 3 - Buspirone Day 4	1		Stress Buspirone - Stress Control	0.7552
Before 5 mg - After Control	0.0005		Before Day 2 - After Day 3	<.0001		Buspirone Day 3 - Control Day 4	1		Basal Control - Stress Control	0.3296
Before 5 mg - Before Control	0.9924		Before Day 2 - Before Day 3	0.0246		Buspirone Day 3 - Buspirone Day 5	0.9997
Before 5 mg - End Control	0.8199		Before Day 2 - End Day 3	<.0001		Buspirone Day 3 - Control Day 5	0.9813
End 5 mg - After Control	0.6095		End Day 2 - After Day 3	0.2921		Buspirone Day 3 - Buspirone Day 6	0.9985
End 5 mg - Before Control	<.0001		End Day 2 - Before Day 3	<.0001		Buspirone Day 3 - Control Day 6	1
End 5 mg - End Control	0.0002		End Day 2 - End Day 3	<.0001		Buspirone Day 3 - Buspirone Day 7	0.891
After Control - Before Control	0.004		After Day 3 - Before Day 3	<.0001		Buspirone Day 3 - Control Day 7	0.9802
After Control - End Control	0.02		After Day 3 - End Day 3	<.0001		Control Day 3 - Buspirone Day 4	0.9998
Before Control - End Control	0.9987		Before Day 3 - End Day 3	<.0001		Control Day 3 - Control Day 4	1
						Control Day 3 - Buspirone Day 5	1
						Control Day 3 - Control Day 5	0.9997
						Control Day 3 - Buspirone Day 6	0.9622
						Control Day 3 - Control Day 6	0.9985
						Control Day 3 - Buspirone Day 7	0.7745
						Control Day 3 - Control Day 7	0.891
						Buspirone Day 4 - Control Day 4	0.9988
						Buspirone Day 4 - Buspirone Day 5	0.9942
						Buspirone Day 4 - Control Day 5	0.934
						Buspirone Day 4 - Buspirone Day 6	1
						Buspirone Day 4 - Control Day 6	1
						Buspirone Day 4 - Buspirone Day 7	0.973
						Buspirone Day 4 - Control Day 7	0.9974
						Control Day 4 - Buspirone Day 5	0.9998
						Control Day 4 - Control Day 5	0.9942
						Control Day 4 - Buspirone Day 6	0.9924
						Control Day 4 - Control Day 6	1
						Control Day 4 - Buspirone Day 7	0.8752
						Control Day 4 - Control Day 7	0.973
						Buspirone Day 5 - Control Day 5	0.9988
						Buspirone Day 5 - Buspirone Day 6	0.8207
						Buspirone Day 5 - Control Day 6	0.9605
						Buspirone Day 5 - Buspirone Day 7	0.3886
						Buspirone Day 5 - Control Day 7	0.7706
						Control Day 5 - Buspirone Day 6	0.7192
						Control Day 5 - Control Day 6	0.8207
						Control Day 5 - Buspirone Day 7	0.4814
						Control Day 5 - Control Day 7	0.3886
						Buspirone Day 6 - Control Day 6	0.9988
						Buspirone Day 6 - Buspirone Day 7	1
						Buspirone Day 6 - Control Day 7	1
						Control Day 6 - Buspirone Day 7	0.9924
						Control Day 6 - Control Day 7	1
						Buspirone Day 7 - Control Day 7	0.9988
						Locomotion
						Buspirone Day 1 - Control Day 1	1
						Buspirone Day 1 - Buspirone Day 2	0.0002
						Buspirone Day 1 - Control Day 2	0.1702
						Buspirone Day 1 - Buspirone Day 3	0.9876
						Buspirone Day 1 - Control Day 3	0.9663
						Buspirone Day 1 - Buspirone Day 4	1
						Buspirone Day 1 - Control Day 4	1
						Buspirone Day 1 - Buspirone Day 5	1
						Buspirone Day 1 - Control Day 5	0.9997
						Buspirone Day 1 - Buspirone Day 6	0.9949
						Buspirone Day 1 - Control Day 6	0.9789
						Buspirone Day 1 - Buspirone Day 7	1
						Buspirone Day 1 - Control Day 7	1
						Control Day 1 - Buspirone Day 2	0.1152
						Control Day 1 - Control Day 2	0.0002
						Control Day 1 - Buspirone Day 3	0.9997
						Control Day 1 - Control Day 3	0.9876
						Control Day 1 - Buspirone Day 4	1
						Control Day 1 - Control Day 4	1
						Control Day 1 - Buspirone Day 5	1
						Control Day 1 - Control Day 5	1
						Control Day 1 - Buspirone Day 6	0.9999
						Control Day 1 - Control Day 6	0.9949
						Control Day 1 - Buspirone Day 7	1
						Control Day 1 - Control Day 7	1
						Buspirone Day 2 - Control Day 2	1
						Buspirone Day 2 - Buspirone Day 3	<.0001
						Buspirone Day 2 - Control Day 3	0.063
						Buspirone Day 2 - Buspirone Day 4	0.0001
						Buspirone Day 2 - Control Day 4	0.1101
						Buspirone Day 2 - Buspirone Day 5	<.0001
						Buspirone Day 2 - Control Day 5	0.0893
						Buspirone Day 2 - Buspirone Day 6	<.0001
						Buspirone Day 2 - Control Day 6	0.0665
						Buspirone Day 2 - Buspirone Day 7	0.0003
						Buspirone Day 2 - Control Day 7	0.1317
						Control Day 2 - Buspirone Day 3	0.0895
						Control Day 2 - Control Day 3	<.0001
						Control Day 2 - Buspirone Day 4	0.1621
						Control Day 2 - Control Day 4	0.0001
						Control Day 2 - Buspirone Day 5	0.1299
						Control Day 2 - Control Day 5	<.0001
						Control Day 2 - Buspirone Day 6	0.0949
						Control Day 2 - Control Day 6	<.0001
						Control Day 2 - Buspirone Day 7	0.196
						Control Day 2 - Control Day 7	0.0003
						Buspirone Day 3 - Control Day 3	1
						Buspirone Day 3 - Buspirone Day 4	0.9936
						Buspirone Day 3 - Control Day 4	0.9999
						Buspirone Day 3 - Buspirone Day 5	0.9999
						Buspirone Day 3 - Control Day 5	1
						Buspirone Day 3 - Buspirone Day 6	1
						Buspirone Day 3 - Control Day 6	1
						Buspirone Day 3 - Buspirone Day 7	0.9464
						Buspirone Day 3 - Control Day 7	0.9972
						Control Day 3 - Buspirone Day 4	0.9762
						Control Day 3 - Control Day 4	0.9936
						Control Day 3 - Buspirone Day 5	0.9977
						Control Day 3 - Control Day 5	0.9999
						Control Day 3 - Buspirone Day 6	1
						Control Day 3 - Control Day 6	1
						Control Day 3 - Buspirone Day 7	0.925
						Control Day 3 - Control Day 7	0.9464
						Buspirone Day 4 - Control Day 4	1
						Buspirone Day 4 - Buspirone Day 5	1
						Buspirone Day 4 - Control Day 5	0.9999
						Buspirone Day 4 - Buspirone Day 6	0.9977
						Buspirone Day 4 - Control Day 6	0.986
						Buspirone Day 4 - Buspirone Day 7	1
						Buspirone Day 4 - Control Day 7	1
						Control Day 4 - Buspirone Day 5	1
						Control Day 4 - Control Day 5	1
						Control Day 4 - Buspirone Day 6	1
						Control Day 4 - Control Day 6	0.9977
						Control Day 4 - Buspirone Day 7	1
						Control Day 4 - Control Day 7	1
						Buspirone Day 5 - Control Day 5	1
						Buspirone Day 5 - Buspirone Day 6	1
						Buspirone Day 5 - Control Day 6	0.9991
						Buspirone Day 5 - Buspirone Day 7	0.9999
						Buspirone Day 5 - Control Day 7	1
						Control Day 5 - Buspirone Day 6	1
						Control Day 5 - Control Day 6	1
						Control Day 5 - Buspirone Day 7	0.9971
						Control Day 5 - Control Day 7	0.9999
						Buspirone Day 6 - Control Day 6	1
						Buspirone Day 6 - Buspirone Day 7	0.9708
						Buspirone Day 6 - Control Day 7	0.9989
						Control Day 6 - Buspirone Day 7	0.9465
						Control Day 6 - Control Day 7	0.9708
						Buspirone Day 7 - Control Day 7	1

## Sheet: Cortisol
Fish	Treatment	Conditions	Cortisol						Posthocs	p values
7	Buspirone	Basal
8	Buspirone	Basal							Buspirone Basal - Control Basal	0.4527
9	Buspirone	Basal							Buspirone Basal - T0 Basal	0.1774
10	Buspirone	Basal							Buspirone Basal - Buspirone Stress	<.0001
11	Buspirone	Basal	0.6535						Buspirone Basal - Control Stress	<.0001
12	Buspirone	Basal							Buspirone Basal - T0 Stress	0.0002
19	Buspirone	Basal							Control Basal - T0 Basal	0.9872
20	Buspirone	Basal	4.611						Control Basal - Buspirone Stress	<.0001
21	Buspirone	Basal							Control Basal - Control Stress	0.0001
22	Buspirone	Basal	2.471						Control Basal - T0 Stress	0.0001
23	Buspirone	Basal	0.6004						T0 Basal - Buspirone Stress	<.0001
24	Buspirone	Basal							T0 Basal - Control Stress	0.0001
31	Buspirone	Basal							T0 Basal - T0 Stress	0.0024
32	Buspirone	Basal	2.823						Buspirone Stress - Control Stress	0.0661
33	Buspirone	Basal							Buspirone Stress - T0 Stress	0.0001
34	Buspirone	Basal	3.123						Control Stress - T0 Stress	0.003
35	Buspirone	Basal	6.732
36	Buspirone	Basal
43	Buspirone	Stress	28.39
44	Buspirone	Stress	131.3
45	Buspirone	Stress	161.6
46	Buspirone	Stress	123.3
47	Buspirone	Stress	132.3
48	Buspirone	Stress	100.7
55	Buspirone	Stress
56	Buspirone	Stress	99.79
57	Buspirone	Stress
58	Buspirone	Stress	122.8
59	Buspirone	Stress	95.79
60	Buspirone	Stress	104.3
67	Buspirone	Stress
68	Buspirone	Stress	164.4
69	Buspirone	Stress
70	Buspirone	Stress	222.5
71	Buspirone	Stress	140.3
72	Buspirone	Stress	179.1
1	Control	Basal	4.675
2	Control	Basal	7.046
3	Control	Basal
4	Control	Basal
5	Control	Basal
6	Control	Basal
13	Control	Basal
14	Control	Basal
15	Control	Basal	6.557
16	Control	Basal	1.302
17	Control	Basal
18	Control	Basal
25	Control	Basal	4.125
26	Control	Basal	5.832
27	Control	Basal	5.521
28	Control	Basal	1.481
29	Control	Basal
30	Control	Basal
37	Control	Stress	118.2
38	Control	Stress	83.39
39	Control	Stress
40	Control	Stress
41	Control	Stress	86.12
42	Control	Stress
49	Control	Stress	91.94
50	Control	Stress	112.8
51	Control	Stress	108.4
52	Control	Stress	101.1
53	Control	Stress	103.2
54	Control	Stress	109.8
61	Control	Stress	88.42
62	Control	Stress	85.75
63	Control	Stress	101.5
64	Control	Stress	98.25
65	Control	Stress
66	Control	Stress	81.42
1	T0	Basal	7.366
2	T0	Basal	6.665
3	T0	Basal	11.29
4	T0	Basal	7.357
5	T0	Basal	7.533
6	T0	Basal	6.532
7	T0	Basal	7.659
8	T0	Basal	0.05506
9	T0	Basal	7.769
10	T0	Basal	5.391
21	T0	Basal	9.634
22	T0	Basal	37.79
23	T0	Basal	10.41
24	T0	Basal	10.88
11	T0	Stress	36.08
12	T0	Stress	40.4
13	T0	Stress	46.99
14	T0	Stress	40.75
15	T0	Stress	33.48
16	T0	Stress	44.65
17	T0	Stress	43.95
18	T0	Stress	56.14
19	T0	Stress	74.07
20	T0	Stress	72.01
25	T0	Stress	43.82
26	T0	Stress	41.49
27	T0	Stress	59.48
28	T0	Stress	44.47

## Sheet: R Data
library(ggplot2)
library(nlme)
library(car)
library (MuMIn)
library(lsmeans)
# plotting models
library (sjPlot)
library (sjmisc)
library (snakecase)
library(outliers)
#### Plot themes ####
PlotTheme <- theme (panel.background = element_rect (fill = "white", colour = "white")) + # removes background and border
theme (axis.line = element_line (colour = "black")) + # adds axis colour
theme (plot.title = element_text (hjust = 0.5)) + # center the title
theme (plot.title = element_text (size = 15, face = "bold")) + # changes text size of title
theme (plot.title = element_text (margin = margin (t = 0, r = 0, b = 30, l = 0))) + # changes distance of title to graph
theme (axis.text = element_text (size = 8)) + # changes text size of the axis
theme (axis.title = element_text (size = 11, face = "bold")) + # changes text size and style of the axis
theme (axis.title.y = element_text (margin = margin (t = 0, r = 10, b = 0, l = 0))) + # changes distance of y axis
theme (axis.title.x = element_text (margin = margin (t = 10, r = 0, b = 0, l = 0))) + # changes distance of x axis
theme (plot.tag = element_text (size = 20, face = "bold", margin = margin (t = 5, r = 0, b = 0, l = 10))) # changes text size, style, and position of the tag
############################################################ DOSE RESPONSE EXPERIMENT PART 1 ##############################################
# import from clipboard
Part1 <- read.table (file = "clipboard", sep = "\t", header = TRUE)
View(Part1)
# make a model Cohesion
M1 <- lme (Cohesion ~ Time * Treatment, random = ~1|Fish.ID, method = "ML", data = Part1, na.action = "na.omit")
M2 <- lme (Cohesion ~ Time + Treatment, random = ~1|Fish.ID, method = "ML", data = Part1, na.action = "na.omit")
AICc (M1, M2)
M10 <- glm (Cohesion ~ Time * Treatment, data = Part1, na.action = "na.omit")
M20 <- lm (Cohesion ~ Time + Treatment, data = Part1, na.action = "na.omit")
anova (M2,M20)
AICc (M1, M2)
# fitted vs standardised residuals
plot (M2)
plot (M2, resid(., type = "p") ~ fitted(.) | Time, abline = 0, grid = FALSE)
plot (M2, resid(., type = "p") ~ fitted(.) | Treatment, abline = 0, grid = FALSE)
plot (M2, resid(., type = "p") ~ fitted(.) | Fish.ID, abline = 0, grid = FALSE)
# qqplots
qqplot (resid (M2), grid = FALSE, envelope = .95, line = "quartiles")
qqPlot (resid (M2), grid = FALSE, groups = Part1$Time, envelope =.95, line = "quartiles")
qqPlot (resid (M2), grid = FALSE, groups = Part1$Treatment, envelope =.95, line = "quartiles")
qqPlot (resid (M2), grid = FALSE, groups = Part1$Fish.ID, envelope =.95, line = "quartiles")
Anova (M2, type = 2)
r.squaredGLMM (M2)
lsmeans (M2, pairwise ~ Time*Treatment)
# make a model top
M1 <- lme (SqrtTop ~ Time * Treatment, random = ~1|Fish.ID, method = "ML", data = Part1, na.action = "na.omit")
M2 <- lme (SqrtTop ~ Time + Treatment, random = ~1|Fish.ID, method = "ML", data = Part1, na.action = "na.omit")
AICc (M1, M2)
# fitted vs standardised residuals
plot (M1)
plot (M1, resid(., type = "p") ~ fitted(.) | Time, abline = 0, grid = FALSE)
plot (M1, resid(., type = "p") ~ fitted(.) | Treatment, abline = 0, grid = FALSE)
plot (M1, resid(., type = "p") ~ fitted(.) | Fish.ID, abline = 0, grid = FALSE)
# qqplots
qqPlot (resid (M1), grid = FALSE, envelope = .95, line = "quartiles")
qqPlot (resid (M1), grid = FALSE, groups = Part1$Time, envelope =.95, line = "quartiles")
qqPlot (resid (M1), grid = FALSE, groups = Part1$Treatment, envelope =.95, line = "quartiles")
qqPlot (resid (M1), grid = FALSE, groups = Part1$Fish.ID, envelope =.95, line = "quartiles")
Anova (M1, type = 3)
r.squaredGLMM (M1)
lsmeans (M1, pairwise ~ Time * Treatment)
# make a model Crossings
M1 <- lme (Crossings ~ Time * Treatment, random = ~1|Fish.ID, method = "ML", data = Part1, na.action = "na.omit")
M2 <- lme (Crossings ~ Time + Treatment, random = ~1|Fish.ID, method = "ML", data = Part1, na.action = "na.omit")
AICc (M1, M2)
# fitted vs standardised residuals
plot (M2)
plot (M2, resid(., type = "p") ~ fitted(.) | Time, abline = 0, grid = FALSE)
plot (M2, resid(., type = "p") ~ fitted(.) | Treatment, abline = 0, grid = FALSE)
plot (M2, resid(., type = "p") ~ fitted(.) | Fish.ID, abline = 0, grid = FALSE)
# qqplots
qqPlot (resid (M2), grid = FALSE, envelope = .95, line = "quartiles")
qqPlot (resid (M2), grid = FALSE, groups = Part1$Time, envelope =.95, line = "quartiles")
qqPlot (resid (M2), grid = FALSE, groups = Part1$Treatment, envelope =.95, line = "quartiles")
qqPlot (resid (M2), grid = FALSE, groups = Part1$Fish.ID, envelope =.95, line = "quartiles")
Anova (M2, type = 3)
r.squaredGLMM (M2)
lsmeans (M1, pairwise ~ Time * Treatment)
# make a model Locomotion
M1 <- lme (SqrtLocomotion ~ Time * Treatment, random = ~1|Fish.ID, method = "ML", data = Part1, na.action = "na.omit")
M2 <- lme (SqrtLocomotion ~ Time + Treatment, random = ~1|Fish.ID, method = "ML", data = Part1, na.action = "na.omit")
AICc (M1, M2)
# fitted vs standardised residuals
plot (M1)
plot (M1, resid(., type = "p") ~ fitted(.) | Time, abline = 0, grid = FALSE)
plot (M1, resid(., type = "p") ~ fitted(.) | Treatment, abline = 0, grid = FALSE)
plot (M1, resid(., type = "p") ~ fitted(.) | Fish.ID, abline = 0, grid = FALSE)
# qqplots
qqPlot (resid (M1), grid = FALSE, envelope = .95, line = "quartiles")
qqPlot (resid (M1), grid = FALSE, groups = Part1$Time, envelope =.95, line = "quartiles")
qqPlot (resid (M1), grid = FALSE, groups = Part1$Treatment, envelope =.95, line = "quartiles")
qqPlot (resid (M1), grid = FALSE, groups = Part1$Fish.ID, envelope =.95, line = "quartiles")
Anova (M1, type = 3)
r.squaredGLMM (M1)
lsmeans (M1, pairwise ~ Time * Treatment)
###############DOSE RESPONSE EXPERIMENT PART 2#################################################################################################################################
# import from clipboard
Part2 <- read.table (file = "clipboard", sep = "\t", header = TRUE)
View(Part2)
# make a model Cohesion
M1 <- lme (LogCohesion ~ Time * Day, random = ~1|Fish.ID, method = "ML", data = Part2, na.action = "na.omit")
M2 <- lme (LogCohesion ~ Time + Day, random = ~1|Fish.ID, method = "ML", data = Part2, na.action = "na.omit")
AICc (M1, M2)
# fitted vs standardised residuals
plot (M1)
plot (M1, resid(., type = "p") ~ fitted(.) | Time, abline = 0, grid = FALSE)
plot (M1, resid(., type = "p") ~ fitted(.) | Day, abline = 0, grid = FALSE)
plot (M1, resid(., type = "p") ~ fitted(.) | Fish.ID, abline = 0, grid = FALSE)
# qqplots
qqPlot (resid (M1), grid = FALSE, envelope = .95, line = "quartiles")
qqPlot (resid (M1), grid = FALSE, groups = Part2$Time, envelope =.95, line = "quartiles")
qqPlot (resid (M1), grid = FALSE, groups = Part2$Day, envelope =.95, line = "quartiles")
qqPlot (resid (M1), grid = FALSE, groups = Part2$Fish.ID, envelope =.95, line = "quartiles")
Anova (M1, type = 3)
r.squaredGLMM (M1)
lsmeans (M1, pairwise ~ Time * Day)
# make a model Top
M1 <- lme (Top ~ Time * Day, random = ~1|Fish.ID, method = "ML", data = Part2, na.action = "na.omit")
M2 <- lme (Top ~ Time + Day, random = ~1|Fish.ID, method = "ML", data = Part2, na.action = "na.omit")
AICc (M1, M2)
# fitted vs standardised residuals
plot (M1)
plot (M1, resid(., type = "p") ~ fitted(.) | Time, abline = 0, grid = FALSE)
plot (M1, resid(., type = "p") ~ fitted(.) | Treatment, abline = 0, grid = FALSE)
plot (M1, resid(., type = "p") ~ fitted(.) | Fish.ID, abline = 0, grid = FALSE)
# qqplots
qqPlot (resid (M1), grid = FALSE, envelope = .95, line = "quartiles")
qqPlot (resid (M1), grid = FALSE, groups = Part2$Time, envelope =.95, line = "quartiles")
qqPlot (resid (M1), grid = FALSE, groups = Part2$Treatment, envelope =.95, line = "quartiles")
qqPlot (resid (M1), grid = FALSE, groups = Part2$Fish.ID, envelope =.95, line = "quartiles")
Anova (M1, type = 3)
r.squaredGLMM (M1)
lsmeans (M1, pairwise ~ Time * Day)
# make a model Crossings
M1 <- lme (Crossings ~ Time * Day, random = ~1|Fish.ID, method = "ML", data = Part2, na.action = "na.omit")
M2 <- lme (Crossings ~ Time + Day, random = ~1|Fish.ID, method = "ML", data = Part2, na.action = "na.omit")
AICc (M1, M2)
# fitted vs standardised residuals
plot (M1)
plot (M1, resid(., type = "p") ~ fitted(.) | Time, abline = 0, grid = FALSE)
plot (M1, resid(., type = "p") ~ fitted(.) | Day, abline = 0, grid = FALSE)
plot (M1, resid(., type = "p") ~ fitted(.) | Fish.ID, abline = 0, grid = FALSE)
# qqplots
qqPlot (resid (M1), grid = FALSE, envelope = .95, line = "quartiles")
qqPlot (resid (M1), grid = FALSE, groups = Part2$Time, envelope =.95, line = "quartiles")
qqPlot (resid (M1), grid = FALSE, groups = Part2$Day, envelope =.95, line = "quartiles")
qqPlot (resid (M1), grid = FALSE, groups = Part2$Fish.ID, envelope =.95, line = "quartiles")
Anova (M1, type = 3)
r.squaredGLMM (M2)
lsmeans (M1, pairwise ~ Time * Day)
# make a model Locomotion
M1 <- lme (Locomotion ~ Time * Day, random = ~1|Fish.ID, method = "ML", data = Part2, na.action = "na.omit")
M2 <- lme (Locomotion ~ Time + Day, random = ~1|Fish.ID, method = "ML", data = Part2, na.action = "na.omit")
AICc (M1, M2)
# fitted vs standardised residuals
plot (M1)
plot (M1, resid(., type = "p") ~ fitted(.) | Time, abline = 0, grid = FALSE)
plot (M1, resid(., type = "p") ~ fitted(.) | Day, abline = 0, grid = FALSE)
plot (M1, resid(., type = "p") ~ fitted(.) | Fish.ID, abline = 0, grid = FALSE)
# qqplots
qqPlot (resid (M1), grid = FALSE, envelope = .95, line = "quartiles")
qqPlot (resid (M1), grid = FALSE, groups = Part1$Time, envelope =.95, line = "quartiles")
qqPlot (resid (M1), grid = FALSE, groups = Part1$Day, envelope =.95, line = "quartiles")
qqPlot (resid (M1), grid = FALSE, groups = Part1$Fish.ID, envelope =.95, line = "quartiles")
Anova (M1, type = 3)
r.squaredGLMM (M1)
lsmeans (M1, pairwise ~ Time * Day)
################################################################## MAIN EXP ########################################
# import from clipboard
MainExp <- read.table (file = "clipboard", sep = "\t", header = TRUE)
View(MainExp)
# make a model Cohesion
M1 <- lme (Cohesion ~ Day * Treatment, random = ~1|Aquaria, method = "ML", data = MainExp, na.action = "na.omit")
M2 <- lme (Cohesion ~ Day + Treatment, random = ~1|Aquaria, method = "ML", data = MainExp, na.action = "na.omit")
AICc (M1, M2)
# fitted vs standardised residuals
plot (M2)
plot (M2, resid(., type = "p") ~ fitted(.) | Day, abline = 0, grid = FALSE)
plot (M2, resid(., type = "p") ~ fitted(.) | Treatment, abline = 0, grid = FALSE)
plot (M2, resid(., type = "p") ~ fitted(.) | Aquaria, abline = 0, grid = FALSE)
# qqplots
qqPlot (resid (M2), grid = FALSE, envelope = .95, line = "quartiles")
qqPlot (resid (M2), grid = FALSE, groups = MainExp$Day, envelope =.95, line = "quartiles")
qqPlot (resid (M2), grid = FALSE, groups = MainExp$Treatment, envelope =.95, line = "quartiles")
qqPlot (resid (M2), grid = FALSE, groups = MainExp$Aquaria, envelope =.95, line = "quartiles")
Anova (M2, type = 3)
r.squaredGLMM (M2)
lsmeans (M2, pairwise ~ Treatment * Day)
# make a model Aggression
M1 <- lme (Aggression ~ Day * Treatment, random = ~1|Aquaria, method = "ML", data = MainExp, na.action = "na.omit")
M2 <- lme (Aggression ~ Day + Treatment, random = ~1|Aquaria, method = "ML", data = MainExp, na.action = "na.omit")
AICc (M1, M2)
# fitted vs standardised residuals
plot (M2)
plot (M2, resid(., type = "p") ~ fitted(.) | Day, abline = 0, grid = FALSE)
plot (M2, resid(., type = "p") ~ fitted(.) | Treatment, abline = 0, grid = FALSE)
plot (M2, resid(., type = "p") ~ fitted(.) | Aquaria, abline = 0, grid = FALSE)
# qqplots
qqPlot (resid (M2), grid = FALSE, envelope = .95, line = "quartiles")
qqPlot (resid (M2), grid = FALSE, groups = MainExp$Day, envelope =.95, line = "quartiles")
qqPlot (resid (M2), grid = FALSE, groups = MainExp$Treatment, envelope =.95, line = "quartiles")
qqPlot (resid (M2), grid = FALSE, groups = MainExp$Aquaria, envelope =.95, line = "quartiles")
Anova (M2, type = 3)
r.squaredGLMM (M2)
lsmeans (M2, pairwise ~ Day)
# make a model Locomotion
M1 <- lme (Locomotion ~ Day * Treatment, random = ~1|Aquaria, method = "ML", data = MainExp, na.action = "na.omit")
M2 <- lme (Locomotion ~ Day + Treatment, random = ~1|Aquaria, method = "ML", data = MainExp, na.action = "na.omit")
AICc (M1, M2)
# fitted vs standardised residuals
plot (M2)
plot (M2, resid(., type = "p") ~ fitted(.) | Day, abline = 0, grid = FALSE)
plot (M2, resid(., type = "p") ~ fitted(.) | Treatment, abline = 0, grid = FALSE)
plot (M2, resid(., type = "p") ~ fitted(.) | Aquaria, abline = 0, grid = FALSE)
# qqplots
qqPlot (resid (M2), grid = FALSE, envelope = .95, line = "quartiles")
qqPlot (resid (M2), grid = FALSE, groups = MainExp$Day, envelope =.95, line = "quartiles")
qqPlot (resid (M2), grid = FALSE, groups = MainExp$Treatment, envelope =.95, line = "quartiles")
qqPlot (resid (M2), grid = FALSE, groups = MainExp$Aquaria, envelope =.95, line = "quartiles")
Anova (M2, type = 3)
r.squaredGLMM (M2)
lsmeans (M2, pairwise ~ Day)
#############################CORTISOL###############################################################################################
# import from clipboard
cortisolonly <- read.table (file = "clipboard", sep = "\t", header = TRUE)
View(cortisolonly)
#### Cortisol
# make a model Cortisol
M1 <- lme (Cortisol ~ Treatment * Conditions, random = ~1|Fish, method = "ML", data = cortisolonly, na.action = "na.omit")
M2 <- lme (Cortisol ~ Treatment + Conditions, random = ~1|Fish, method = "ML", data = cortisolonly, na.action = "na.omit")
AICc (M1, M2)
# fitted vs standardised residuals
plot (M1)
plot (M1, resid(., type = "p") ~ fitted(.) | Treatment, abline = 0, grid = FALSE)
plot (M1, resid(., type = "p") ~ fitted(.) | Conditions, abline = 0, grid = FALSE)
plot (M1, resid(., type = "p") ~ fitted(.) | Fish, abline = 0, grid = FALSE)
# qqplots
qqPlot (resid (M1), grid = FALSE, envelope = .95, line = "quartiles")
qqPlot (resid (M1), grid = FALSE, groups = cortisolonly$Treatment, envelope =.95, line = "quartiles")
qqPlot (resid (M1), grid = FALSE, groups = cortisolonly$Conditions, envelope =.95, line = "quartiles")
qqPlot (resid (M1), grid = FALSE, groups = cortisolonly$Fish, envelope =.95, line = "quartiles")
Anova (M1, type = 3)
r.squaredGLMM (M1)
lsmeans (M1, pairwise ~ Treatment * Conditions)
###########################################################################################################################
# Outlier Test
### control basal
## HTDl	HIDl	HIHTDl	HTDm	HIDm	HIHTDm	HTVv	HIVv	HIHTVv	HTPOA	HIPOA	HIHTPOA	HTRN	HIRN	HIHTRN	HT1ARN
library(readr)
library(outliers)
library(EnvStats)
# import from clipboard
maincontrolbasal <- read.table (file = "clipboard", sep = "\t", header = TRUE)
View(maincontrolbasal)
rosnerTest(maincontrolbasal$HTDl, k = 4)
rosnerTest(maincontrolbasal$HIDl, k = 4)
rosnerTest(maincontrolbasal$HIHTDl, k = 4)
rosnerTest(maincontrolbasal$HTDm, k = 4)
rosnerTest(maincontrolbasal$HIDm, k = 4)
rosnerTest(maincontrolbasal$HIHTDm, k = 4)
rosnerTest(maincontrolbasal$HTVv, k = 4)
rosnerTest(maincontrolbasal$HIVv, k = 4)
rosnerTest(maincontrolbasal$HIHTVv, k = 4)
rosnerTest(maincontrolbasal$HTPOA, k = 4)
rosnerTest(maincontrolbasal$HIPOA, k = 4)
rosnerTest(maincontrolbasal$HIHTPOA, k = 4)
rosnerTest(maincontrolbasal$HTRN, k = 4)
rosnerTest(maincontrolbasal$HIRN, k = 4)
rosnerTest(maincontrolbasal$HIHTRN, k = 4)
rosnerTest(maincontrolbasal$HT1ARN, k = 4)
rosnerTest(maincontrolbasal$HT1ADM, k = 4)
## control stress
# import from clipboard
maincontrolstress <- read.table (file = "clipboard", sep = "\t", header = TRUE)
View(maincontrolstress)
rosnerTest(maincontrolstress$HTDl, k = 4)
rosnerTest(maincontrolstress$HIDl, k = 4)
rosnerTest(maincontrolstress$HIHTDl, k = 4)
rosnerTest(maincontrolstress$HTDm, k = 4)
rosnerTest(maincontrolstress$HIDm, k = 4)
rosnerTest(maincontrolstress$HIHTDm, k = 4)
rosnerTest(maincontrolstress$HTVv, k = 4)
rosnerTest(maincontrolstress$HIVv, k = 4)
rosnerTest(maincontrolstress$HIHTVv, k = 4)
rosnerTest(maincontrolstress$HTPOA, k = 4)
rosnerTest(maincontrolstress$HIPOA, k = 4)
rosnerTest(maincontrolstress$HIHTPOA, k = 4)
rosnerTest(maincontrolstress$HTRN, k = 4)
rosnerTest(maincontrolstress$HIRN, k = 4)
rosnerTest(maincontrolstress$HIHTRN, k = 4)
rosnerTest(maincontrolstress$HT1ARN, k = 4)
rosnerTest(maincontrolstress$HT1ADM, k = 4)
## buspirone basal
# import from clipboard
mainbuspbasal <- read.table (file = "clipboard", sep = "\t", header = TRUE)
View(mainbuspbasal)
rosnerTest(mainbuspbasal$HTDl, k = 4)
rosnerTest(mainbuspbasal$HIDl, k = 4)
rosnerTest(mainbuspbasal$HIHTDl, k = 4)
rosnerTest(mainbuspbasal$HTDm, k = 4)
rosnerTest(mainbuspbasal$HIDm, k = 4)
rosnerTest(mainbuspbasal$HIHTDm, k = 4)
rosnerTest(mainbuspbasal$HTVv, k = 4)
rosnerTest(mainbuspbasal$HIVv, k = 4)
rosnerTest(mainbuspbasal$HIHTVv, k = 4)
rosnerTest(mainbuspbasal$HTPOA, k = 4)
rosnerTest(mainbuspbasal$HIPOA, k = 4)
rosnerTest(mainbuspbasal$HIHTPOA, k = 4)
rosnerTest(mainbuspbasal$HTRN, k = 4)
rosnerTest(mainbuspbasal$HIRN, k = 4)
rosnerTest(mainbuspbasal$HIHTRN, k = 4)
rosnerTest(mainbuspbasal$HT1ARN, k = 4)
rosnerTest(mainbuspbasal$HT1ADM, k = 4)
## buspirone stress
# import from clipboard
mainbuspstress <- read.table (file = "clipboard", sep = "\t", header = TRUE)
View(mainbuspstress)
rosnerTest(mainbuspstress$HTDl, k = 4)
rosnerTest(mainbuspstress$HIDl, k = 4)
rosnerTest(mainbuspstress$HIHTDl, k = 4)
rosnerTest(mainbuspstress$HTDm, k = 4)
rosnerTest(mainbuspstress$HIDm, k = 4)
rosnerTest(mainbuspstress$HIHTDm, k = 4)
rosnerTest(mainbuspstress$HTVv, k = 4)
rosnerTest(mainbuspstress$HIVv, k = 4)
rosnerTest(mainbuspstress$HIHTVv, k = 4)
rosnerTest(mainbuspstress$HTPOA, k = 4)
rosnerTest(mainbuspstress$HIPOA, k = 4)
rosnerTest(mainbuspstress$HIHTPOA, k = 4)
rosnerTest(mainbuspstress$HTRN, k = 4)
rosnerTest(mainbuspstress$HIRN, k = 4)
rosnerTest(mainbuspstress$HIHTRN, k = 4)
rosnerTest(mainbuspstress$HT1ARN, k = 4)
rosnerTest(mainbuspstress$HT1ADM, k = 4)
##cortisol control basal
# import from clipboard
cortcontrolbasal <- read.table (file = "clipboard", sep = "\t", header = TRUE)
View(cortcontrolbasal)
rosnerTest(cortcontrolbasal$Cortisol, k = 4)
##cortisol control stress
cortcontrolstress <- read.table (file = "clipboard", sep = "\t", header = TRUE)
View(cortcontrolstress)
rosnerTest(cortcontrolstress$Cortisol, k = 4)
##cortisol buspirone basal
cortbuspbasal <- read.table (file = "clipboard", sep = "\t", header = TRUE)
View(cortbuspbasal)
rosnerTest(cortbuspbasal$Cortisol, k = 4)
##cortisol buspirone stress
cortbuspstress <- read.table (file = "clipboard", sep = "\t", header = TRUE)
View(cortbuspstress)
rosnerTest(cortbuspstress$Cortisol, k = 4)
##cortisol & monoamines T0 basal
T0basal <- read.table (file = "clipboard", sep = "\t", header = TRUE)
View(T0basal)
rosnerTest(T0basal$Cortisol, k = 4)
rosnerTest(T0basal$HT, k = 4)
rosnerTest(T0basal$HI, k = 4)
rosnerTest(T0basal$HIHT, k = 4)
##cortisol & monoamines T0 stress
T0stress <- read.table (file = "clipboard", sep = "\t", header = TRUE)
View(T0stress)
rosnerTest(T0stress$Cortisol, k = 4)
rosnerTest(T0stress$HT, k = 4)
rosnerTest(T0stress$HI, k = 4)
rosnerTest(T0stress$HIHT, k = 4)
#############################monoamine data############################################################################################################
# import from clipboard
cortisolonly <- read.table (file = "clipboard", sep = "\t", header = TRUE)
View(cortisolonly)
#### Cortisol
# make a model Cortisol control
M1 <- lme (Cortisol ~ Treatment * Conditions, random = ~1|Fish, method = "ML", data = cortisolonly, na.action = "na.omit")
M2 <- lme (Cortisol ~ Treatment + Conditions, random = ~1|Fish, method = "ML", data = cortisolonly, na.action = "na.omit")
AICc (M1, M2)
# fitted vs standardised residuals
plot (M1)
plot (M1, resid(., type = "p") ~ fitted(.) | Treatment, abline = 0, grid = FALSE)
plot (M1, resid(., type = "p") ~ fitted(.) | Conditions, abline = 0, grid = FALSE)
plot (M1, resid(., type = "p") ~ fitted(.) | Fish, abline = 0, grid = FALSE)
# qqplots
qqPlot (resid (M1), grid = FALSE, envelope = .95, line = "quartiles")
qqPlot (resid (M1), grid = FALSE, groups = cortisolonly$Treatment, envelope =.95, line = "quartiles")
qqPlot (resid (M1), grid = FALSE, groups = cortisolonly$Conditions, envelope =.95, line = "quartiles")
qqPlot (resid (M1), grid = FALSE, groups = cortisolonly$Fish, envelope =.95, line = "quartiles")
Anova (M1, type = 3)
r.squaredGLMM (M1)
lsmeans (M1, pairwise ~ Treatment * Conditions)
#### HTDl
# make a model
M1 <- lme (HTDl ~ Conditions * Treatment, random = ~1|Aquaria, method = "ML", data = Phys, na.action = "na.omit")
M2 <- lme (HTDl ~ Conditions + Treatment, random = ~1|Aquaria, method = "ML", data = Phys, na.action = "na.omit")
AICc (M1, M2)
# fitted vs standardised residuals
plot (M1)
plot (M1, resid(., type = "p") ~ fitted(.) | Conditions, abline = 0, grid = FALSE)
plot (M1, resid(., type = "p") ~ fitted(.) | Treatment, abline = 0, grid = FALSE)
plot (M1, resid(., type = "p") ~ fitted(.) | Aquaria, abline = 0, grid = FALSE)
# qqplots
qqPlot (resid (M1), grid = FALSE, envelope = .95, line = "quartiles")
qqPlot (resid (M1), grid = FALSE, groups = Phys$Conditions, envelope =.95, line = "quartiles")
qqPlot (resid (M1), grid = FALSE, groups = Phys$Treatment, envelope =.95, line = "quartiles")
qqPlot (resid (M1), grid = FALSE, groups = Phys$Aquaria, envelope =.95, line = "quartiles")
Anova (M1, type = 3)
r.squaredGLMM (M1)
lsmeans (M1, pairwise ~ Conditions * Treatment)
####5-HIAA Dl
# make a model
M1 <- lme (HIDl ~ Conditions * Treatment, random = ~1|Aquaria, method = "ML", data = Phys, na.action = "na.omit")
M2 <- lme (HIDl ~ Conditions + Treatment, random = ~1|Aquaria, method = "ML", data = Phys, na.action = "na.omit")
AICc (M1, M2)
# fitted vs standardised residuals
plot (M2)
plot (M2, resid(., type = "p") ~ fitted(.) | Conditions, abline = 0, grid = FALSE)
plot (M2, resid(., type = "p") ~ fitted(.) | Treatment, abline = 0, grid = FALSE)
plot (M2, resid(., type = "p") ~ fitted(.) | Aquaria, abline = 0, grid = FALSE)
# qqplots
qqPlot (resid (M2), grid = FALSE, envelope = .95, line = "quartiles")
qqPlot (resid (M2), grid = FALSE, groups = Phys$Conditions, envelope =.95, line = "quartiles")
qqPlot (resid (M2), grid = FALSE, groups = Phys$Treatment, envelope =.95, line = "quartiles")
qqPlot (resid (M2), grid = FALSE, groups = Phys$Aquaria, envelope =.95, line = "quartiles")
Anova (M2, type = 2)
r.squaredGLMM (M2)
lsmeans (M2, pairwise ~ Conditions * Treatment)
#### 5-HAA/5-HT Dl
M1 <- lme (HIHTDl ~ Conditions * Treatment, random = ~1|Aquaria, method = "ML", data = Phys, na.action = "na.omit")
M2 <- lme (HIHTDl ~ Conditions + Treatment, random = ~1|Aquaria, method = "ML", data = Phys, na.action = "na.omit")
AICc (M1, M2)
# fitted vs standardised residuals
plot (M2)
plot (M2, resid(., type = "p") ~ fitted(.) | Conditions, abline = 0, grid = FALSE)
plot (M2, resid(., type = "p") ~ fitted(.) | Treatment, abline = 0, grid = FALSE)
plot (M2, resid(., type = "p") ~ fitted(.) | Aquaria, abline = 0, grid = FALSE)
# qqplots
qqPlot (resid (M2), grid = FALSE, envelope = .95, line = "quartiles")
qqPlot (resid (M2), grid = FALSE, groups = Phys$Conditions, envelope =.95, line = "quartiles")
qqPlot (resid (M2), grid = FALSE, groups = Phys$Treatment, envelope =.95, line = "quartiles")
qqPlot (resid (M2), grid = FALSE, groups = Phys$Aquaria, envelope =.95, line = "quartiles")
Anova (M2, type = 2)
r.squaredGLMM (M2)
lsmeans (M2, pairwise ~ Conditions * Treatment)
#### 5-HT Dm
M1 <- lme (HTDm ~ Conditions * Treatment, random = ~1|Aquaria, method = "ML", data = Phys, na.action = "na.omit")
M2 <- lme (HTDm ~ Conditions + Treatment, random = ~1|Aquaria, method = "ML", data = Phys, na.action = "na.omit")
AICc (M1, M2)
# fitted vs standardised residuals
plot (M2)
plot (M2, resid(., type = "p") ~ fitted(.) | Conditions, abline = 0, grid = FALSE)
plot (M2, resid(., type = "p") ~ fitted(.) | Treatment, abline = 0, grid = FALSE)
plot (M2, resid(., type = "p") ~ fitted(.) | Aquaria, abline = 0, grid = FALSE)
# qqplots
qqPlot (resid (M2), grid = FALSE, envelope = .95, line = "quartiles")
qqPlot (resid (M2), grid = FALSE, groups = Phys$Conditions, envelope =.95, line = "quartiles")
qqPlot (resid (M2), grid = FALSE, groups = Phys$Treatment, envelope =.95, line = "quartiles")
qqPlot (resid (M2), grid = FALSE, groups = Phys$Aquaria, envelope =.95, line = "quartiles")
Anova (M2, type = 2)
r.squaredGLMM (M2)
lsmeans (M2, pairwise ~ Conditions * Treatment)
#### 5-HIAA Dm
M1 <- lme (HIDm ~ Conditions * Treatment, random = ~1|Aquaria, method = "ML", data = Phys, na.action = "na.omit")
M2 <- lme (HIDm ~ Conditions + Treatment, random = ~1|Aquaria, method = "ML", data = Phys, na.action = "na.omit")
AICc (M1, M2)
# fitted vs standardised residuals
plot (M2)
plot (M2, resid(., type = "p") ~ fitted(.) | Conditions, abline = 0, grid = FALSE)
plot (M2, resid(., type = "p") ~ fitted(.) | Treatment, abline = 0, grid = FALSE)
plot (M2, resid(., type = "p") ~ fitted(.) | Aquaria, abline = 0, grid = FALSE)
# qqplots
qqPlot (resid (M2), grid = FALSE, envelope = .95, line = "quartiles")
qqPlot (resid (M2), grid = FALSE, groups = Phys$Conditions, envelope =.95, line = "quartiles")
qqPlot (resid (M2), grid = FALSE, groups = Phys$Treatment, envelope =.95, line = "quartiles")
qqPlot (resid (M2), grid = FALSE, groups = Phys$Aquaria, envelope =.95, line = "quartiles")
Anova (M2, type = 2)
r.squaredGLMM (M2)
lsmeans (M2, pairwise ~ Conditions * Treatment)
#### 5-HAA/5-HT Dm
M1 <- lme (HIHTDm ~ Conditions * Treatment, random = ~1|Aquaria, method = "ML", data = Phys, na.action = "na.omit")
M2 <- lme (HIHTDm ~ Conditions + Treatment, random = ~1|Aquaria, method = "ML", data = Phys, na.action = "na.omit")
AICc (M1, M2)
# fitted vs standardised residuals
plot (M2)
plot (M2, resid(., type = "p") ~ fitted(.) | Conditions, abline = 0, grid = FALSE)
plot (M2, resid(., type = "p") ~ fitted(.) | Treatment, abline = 0, grid = FALSE)
plot (M2, resid(., type = "p") ~ fitted(.) | Aquaria, abline = 0, grid = FALSE)
# qqplots
qqPlot (resid (M2), grid = FALSE, envelope = .95, line = "quartiles")
qqPlot (resid (M2), grid = FALSE, groups = Phys$Conditions, envelope =.95, line = "quartiles")
qqPlot (resid (M2), grid = FALSE, groups = Phys$Treatment, envelope =.95, line = "quartiles")
qqPlot (resid (M2), grid = FALSE, groups = Phys$Aquaria, envelope =.95, line = "quartiles")
Anova (M2, type = 2)
r.squaredGLMM (M2)
lsmeans (M2, pairwise ~ Conditions * Treatment)
#### 5-HT Vv
M1 <- lme (HTVv ~ Conditions * Treatment, random = ~1|Aquaria, method = "ML", data = Phys, na.action = "na.omit")
M2 <- lme (HTVv ~ Conditions + Treatment, random = ~1|Aquaria, method = "ML", data = Phys, na.action = "na.omit")
AICc (M1, M2)
# fitted vs standardised residuals
plot (M1)
plot (M1, resid(., type = "p") ~ fitted(.) | Conditions, abline = 0, grid = FALSE)
plot (M1, resid(., type = "p") ~ fitted(.) | Treatment, abline = 0, grid = FALSE)
plot (M1, resid(., type = "p") ~ fitted(.) | Aquaria, abline = 0, grid = FALSE)
# qqplots
qqPlot (resid (M1), grid = FALSE, envelope = .95, line = "quartiles")
qqPlot (resid (M1), grid = FALSE, groups = Phys$Conditions, envelope =.95, line = "quartiles")
qqPlot (resid (M1), grid = FALSE, groups = Phys$Treatment, envelope =.95, line = "quartiles")
qqPlot (resid (M1), grid = FALSE, groups = Phys$Aquaria, envelope =.95, line = "quartiles")
Anova (M1, type = 2)
r.squaredGLMM (M1)
lsmeans (M2, pairwise ~ Conditions * Treatment)
#### 5-HIAA Vv
M1 <- lme (HIVv ~ Conditions * Treatment, random = ~1|Aquaria, method = "ML", data = Phys, na.action = "na.omit")
M2 <- lme (HIVv ~ Conditions + Treatment, random = ~1|Aquaria, method = "ML", data = Phys, na.action = "na.omit")
AICc (M1, M2)
# fitted vs standardised residuals
plot (M2)
plot (M2, resid(., type = "p") ~ fitted(.) | Conditions, abline = 0, grid = FALSE)
plot (M2, resid(., type = "p") ~ fitted(.) | Treatment, abline = 0, grid = FALSE)
plot (M2, resid(., type = "p") ~ fitted(.) | Aquaria, abline = 0, grid = FALSE)
# qqplots
qqPlot (resid (M2), grid = FALSE, envelope = .95, line = "quartiles")
qqPlot (resid (M2), grid = FALSE, groups = Phys$Conditions, envelope =.95, line = "quartiles")
qqPlot (resid (M2), grid = FALSE, groups = Phys$Treatment, envelope =.95, line = "quartiles")
qqPlot (resid (M2), grid = FALSE, groups = Phys$Aquaria, envelope =.95, line = "quartiles")
Anova (M2, type = 2)
r.squaredGLMM (M2)
lsmeans (M2, pairwise ~ Conditions * Treatment)
#### 5-HAA/5-HT Vv
M1 <- lme (HIHTVv ~ Conditions * Treatment, random = ~1|Aquaria, method = "ML", data = Phys, na.action = "na.omit")
M2 <- lme (HIHTVv ~ Conditions + Treatment, random = ~1|Aquaria, method = "ML", data = Phys, na.action = "na.omit")
AICc (M1, M2)
# fitted vs standardised residuals
plot (M2)
plot (M2, resid(., type = "p") ~ fitted(.) | Conditions, abline = 0, grid = FALSE)
plot (M2, resid(., type = "p") ~ fitted(.) | Treatment, abline = 0, grid = FALSE)
plot (M2, resid(., type = "p") ~ fitted(.) | Aquaria, abline = 0, grid = FALSE)
# qqplots
qqPlot (resid (M2), grid = FALSE, envelope = .95, line = "quartiles")
qqPlot (resid (M2), grid = FALSE, groups = Phys$Conditions, envelope =.95, line = "quartiles")
qqPlot (resid (M2), grid = FALSE, groups = Phys$Treatment, envelope =.95, line = "quartiles")
qqPlot (resid (M2), grid = FALSE, groups = Phys$Aquaria, envelope =.95, line = "quartiles")
Anova (M2, type = 2)
r.squaredGLMM (M2)
lsmeans (M2, pairwise ~ Conditions * Treatment)
#### 5-HT POA
M1 <- lme (HTPOA ~ Conditions * Treatment, random = ~1|Aquaria, method = "ML", data = Phys, na.action = "na.omit")
M2 <- lme (HTPOA ~ Conditions + Treatment, random = ~1|Aquaria, method = "ML", data = Phys, na.action = "na.omit")
AICc (M1, M2)
# fitted vs standardised residuals
plot (M2)
plot (M2, resid(., type = "p") ~ fitted(.) | Conditions, abline = 0, grid = FALSE)
plot (M2, resid(., type = "p") ~ fitted(.) | Treatment, abline = 0, grid = FALSE)
plot (M2, resid(., type = "p") ~ fitted(.) | Aquaria, abline = 0, grid = FALSE)
# qqplots
qqPlot (resid (M2), grid = FALSE, envelope = .95, line = "quartiles")
qqPlot (resid (M2), grid = FALSE, groups = Phys$Conditions, envelope =.95, line = "quartiles")
qqPlot (resid (M2), grid = FALSE, groups = Phys$Treatment, envelope =.95, line = "quartiles")
qqPlot (resid (M2), grid = FALSE, groups = Phys$Aquaria, envelope =.95, line = "quartiles")
Anova (M2, type = 2)
r.squaredGLMM (M2)
lsmeans (M2, pairwise ~ Conditions * Treatment)
#### 5-HIAA POA
M1 <- lme (HIPOA ~ Conditions * Treatment, random = ~1|Aquaria, method = "ML", data = Phys, na.action = "na.omit")
M2 <- lme (HIPOA ~ Conditions + Treatment, random = ~1|Aquaria, method = "ML", data = Phys, na.action = "na.omit")
AICc (M1, M2)
# fitted vs standardised residuals
plot (M2)
plot (M2, resid(., type = "p") ~ fitted(.) | Conditions, abline = 0, grid = FALSE)
plot (M2, resid(., type = "p") ~ fitted(.) | Treatment, abline = 0, grid = FALSE)
plot (M2, resid(., type = "p") ~ fitted(.) | Aquaria, abline = 0, grid = FALSE)
# qqplots
qqPlot (resid (M2), grid = FALSE, envelope = .95, line = "quartiles")
qqPlot (resid (M2), grid = FALSE, groups = Phys$Conditions, envelope =.95, line = "quartiles")
qqPlot (resid (M2), grid = FALSE, groups = Phys$Treatment, envelope =.95, line = "quartiles")
qqPlot (resid (M2), grid = FALSE, groups = Phys$Aquaria, envelope =.95, line = "quartiles")
Anova (M2, type = 2)
r.squaredGLMM (M2)
lsmeans (M2, pairwise ~ Conditions * Treatment)
#### 5-HAA/5-HT POA
M1 <- lme (HIHTPOA ~ Conditions * Treatment, random = ~1|Aquaria, method = "ML", data = Phys, na.action = "na.omit")
M2 <- lme (HIHTPOA ~ Conditions + Treatment, random = ~1|Aquaria, method = "ML", data = Phys, na.action = "na.omit")
AICc (M1, M2)
# fitted vs standardised residuals
plot (M1)
plot (M1, resid(., type = "p") ~ fitted(.) | Conditions, abline = 0, grid = FALSE)
plot (M1, resid(., type = "p") ~ fitted(.) | Treatment, abline = 0, grid = FALSE)
plot (M1, resid(., type = "p") ~ fitted(.) | Aquaria, abline = 0, grid = FALSE)
# qqplots
qqPlot (resid (M1), grid = FALSE, envelope = .95, line = "quartiles")
qqPlot (resid (M1), grid = FALSE, groups = Phys$Conditions, envelope =.95, line = "quartiles")
qqPlot (resid (M1), grid = FALSE, groups = Phys$Treatment, envelope =.95, line = "quartiles")
qqPlot (resid (M1), grid = FALSE, groups = Phys$Aquaria, envelope =.95, line = "quartiles")
Anova (M1, type = 3)
r.squaredGLMM (M1)
lsmeans (M1, pairwise ~ Conditions * Treatment)
#### 5-HT RN
M1 <- lme (HTRN ~ Conditions * Treatment, random = ~1|Aquaria, method = "ML", data = Phys, na.action = "na.omit")
M2 <- lme (HTRN ~ Conditions + Treatment, random = ~1|Aquaria, method = "ML", data = Phys, na.action = "na.omit")
AICc (M1, M2)
# fitted vs standardised residuals
plot (M2)
plot (M2, resid(., type = "p") ~ fitted(.) | Conditions, abline = 0, grid = FALSE)
plot (M2, resid(., type = "p") ~ fitted(.) | Treatment, abline = 0, grid = FALSE)
plot (M2, resid(., type = "p") ~ fitted(.) | Aquaria, abline = 0, grid = FALSE)
# qqplots
qqPlot (resid (M2), grid = FALSE, envelope = .95, line = "quartiles")
qqPlot (resid (M2), grid = FALSE, groups = Phys$Conditions, envelope =.95, line = "quartiles")
qqPlot (resid (M2), grid = FALSE, groups = Phys$Treatment, envelope =.95, line = "quartiles")
qqPlot (resid (M2), grid = FALSE, groups = Phys$Aquaria, envelope =.95, line = "quartiles")
Anova (M2, type = 2)
r.squaredGLMM (M2)
lsmeans (M2, pairwise ~ Conditions * Treatment)
#### 5-HIAA RN
M1 <- lme (HIRN ~ Conditions * Treatment, random = ~1|Aquaria, method = "ML", data = Phys, na.action = "na.omit")
M2 <- lme (HIRN ~ Conditions + Treatment, random = ~1|Aquaria, method = "ML", data = Phys, na.action = "na.omit")
AICc (M1, M2)
# fitted vs standardised residuals
plot (M2)
plot (M2, resid(., type = "p") ~ fitted(.) | Conditions, abline = 0, grid = FALSE)
plot (M2, resid(., type = "p") ~ fitted(.) | Treatment, abline = 0, grid = FALSE)
plot (M2, resid(., type = "p") ~ fitted(.) | Aquaria, abline = 0, grid = FALSE)
# qqplots
qqPlot (resid (M2), grid = FALSE, envelope = .95, line = "quartiles")
qqPlot (resid (M2), grid = FALSE, groups = Phys$Conditions, envelope =.95, line = "quartiles")
qqPlot (resid (M2), grid = FALSE, groups = Phys$Treatment, envelope =.95, line = "quartiles")
qqPlot (resid (M2), grid = FALSE, groups = Phys$Aquaria, envelope =.95, line = "quartiles")
Anova (M2, type = 2)
r.squaredGLMM (M2)
lsmeans (M2, pairwise ~ Conditions * Treatment)
#### 5-HAA/5-HT RN
M1 <- lme (HIHTRN ~ Conditions * Treatment, random = ~1|Aquaria, method = "ML", data = Phys, na.action = "na.omit")
M2 <- lme (HIHTRN ~ Conditions + Treatment, random = ~1|Aquaria, method = "ML", data = Phys, na.action = "na.omit")
AICc (M1, M2)
# fitted vs standardised residuals
plot (M1)
plot (M1, resid(., type = "p") ~ fitted(.) | Conditions, abline = 0, grid = FALSE)
plot (M1, resid(., type = "p") ~ fitted(.) | Treatment, abline = 0, grid = FALSE)
plot (M1, resid(., type = "p") ~ fitted(.) | Aquaria, abline = 0, grid = FALSE)
# qqplots
qqPlot (resid (M1), grid = FALSE, envelope = .95, line = "quartiles")
qqPlot (resid (M1), grid = FALSE, groups = Phys$Conditions, envelope =.95, line = "quartiles")
qqPlot (resid (M1), grid = FALSE, groups = Phys$Treatment, envelope =.95, line = "quartiles")
qqPlot (resid (M1), grid = FALSE, groups = Phys$Aquaria, envelope =.95, line = "quartiles")
Anova (M1, type = 3)
r.squaredGLMM (M1)
lsmeans (M1, pairwise ~ Conditions * Treatment)
#### 5-HT1AA RN
M1 <- lme (SqrtHT1ARN ~ Conditions * Treatment, random = ~1|Aquaria, method = "ML", data = Phys, na.action = "na.omit")
M2 <- lme (SqrtHT1ARN ~ Conditions + Treatment, random = ~1|Aquaria, method = "ML", data = Phys, na.action = "na.omit")
AICc (M1, M2)
# fitted vs standardised residuals
plot (M1)
plot (M1, resid(., type = "p") ~ fitted(.) | Conditions, abline = 0, grid = FALSE)
plot (M1, resid(., type = "p") ~ fitted(.) | Treatment, abline = 0, grid = FALSE)
plot (M1, resid(., type = "p") ~ fitted(.) | Aquaria, abline = 0, grid = FALSE)
# qqplots
qqPlot (resid (M1), grid = FALSE, envelope = .95, line = "quartiles")
qqPlot (resid (M1), grid = FALSE, groups = Phys$Conditions, envelope =.95, line = "quartiles")
qqPlot (resid (M1), grid = FALSE, groups = Phys$Treatment, envelope =.95, line = "quartiles")
qqPlot (resid (M1), grid = FALSE, groups = Phys$Aquaria, envelope =.95, line = "quartiles")
Anova (M1, type = 3)
r.squaredGLMM (M1)
lsmeans (M1, pairwise ~ Conditions * Treatment)
#### 5-HT1AA DM
M1 <- lme (HT1ADM ~ Conditions * Treatment, random = ~1|Aquaria, method = "ML", data = Phys, na.action = "na.omit")
M2 <- lme (HT1ADM ~ Conditions + Treatment, random = ~1|Aquaria, method = "ML", data = Phys, na.action = "na.omit")
AICc (M1, M2)
# fitted vs standardised residuals
plot (M1)
plot (M1, resid(., type = "p") ~ fitted(.) | Conditions, abline = 0, grid = FALSE)
plot (M1, resid(., type = "p") ~ fitted(.) | Treatment, abline = 0, grid = FALSE)
plot (M1, resid(., type = "p") ~ fitted(.) | Aquaria, abline = 0, grid = FALSE)
# qqplots
qqPlot (resid (M1), grid = FALSE, envelope = .95, line = "quartiles")
qqPlot (resid (M1), grid = FALSE, groups = Phys$Conditions, envelope =.95, line = "quartiles")
qqPlot (resid (M1), grid = FALSE, groups = Phys$Treatment, envelope =.95, line = "quartiles")
qqPlot (resid (M1), grid = FALSE, groups = Phys$Aquaria, envelope =.95, line = "quartiles")
Anova (M1, type = 3)
r.squaredGLMM (M1)
##########################################T0######################################################################
# import from clipboard
T0 <- read.table (file = "clipboard", sep = "\t", header = TRUE)
View(T0)
t.test(HT ~ Stress, data = T0)
t.test(HI ~ Stress, data = T0)
t.test(HIHT ~ Stress, data = T0)
